1        **A national ‘safe and just operating space’ for all in India: Past, Present and Future**

2                                        Ajishnu Roy<sup>1</sup>, Kousik Pramanick<sup>1\*</sup>

3

4        <sup>1</sup>Integrative Biology Research Unit (IBRU), Department of Life Sciences,

5        Presidency University, 86/1 College Street Kolkata – 700076

6        <sup>1</sup>Email: [ajishnuroy1990@gmail.com](mailto:ajishnuroy1990@gmail.com)

7

8        \*Corresponding Author

9        Integrative Biology Research Unit (IBRU), Department of Life Sciences,

10        Presidency University, 86/1 College Street Kolkata – 700076

11        Email ID: [kousik.dbs@presiuniv.ac.in](mailto:kousik.dbs@presiuniv.ac.in)

12

13

14

15

16

17

18

19

20

21

22

23

24

25 **Abstract:**

26 With 1.3 billion populaces on the commencement of the 21<sup>st</sup> century, India is currently  
27 impending towards upholding a subtle equilibrium between persisting social development  
28 and well-being without depleting existing biophysical resources at the national level or  
29 surpassing global average per capita obtainability. In this paper, we have structured a top-  
30 down per capita framework to explore national ‘safe and just operating space’ (NSJOS) to  
31 apprehend not only past fluctuations that bring about the present conditions but also the  
32 plausible future consequences, with India as a case study. Coalescing 27 indicators, all  
33 pertaining to Sustainable Development Goals (except – SDG 17), accompanied by their  
34 corresponding environmental boundaries or preferred social thresholds, present study probes  
35 into both biophysical (for environmental stress) and social development (for social deficit)  
36 attributes of India. This analysis shows India has already crossed three of seven dimensions  
37 of biophysical boundaries (freshwater, nitrogen and phosphorus use). Also, at the existing  
38 rate, India is going to cross the remainder of the boundaries within 2045-2050 (climate  
39 change, arable land use, ecological and material footprint). Of 20 indicators used for social  
40 development, only five have already or will meet corresponding desired thresholds of United  
41 Nations Sustainable Development Goals 2015. Using tendencies of past variations, the results  
42 indicate that if lowest per capita consumption can be attained and uphold, even with projected  
43 population growth, total consumption of four biophysical resources (climate change, nitrogen  
44 use, ecological and material footprint) can be slashed from today’s level in 2050. Adaptations  
45 in national policy are indispensable if India wants to accomplish sufficiency in biophysical  
46 resources whilst bestowing social equity in access and exploitation of those resources towards  
47 the continuance of social developments in forthcoming times.

48 **Keywords:** Sustainable development goals; planetary boundaries; doughnut economy;  
49 national safe and just operating space; India;

50

51

52

53

54

55 **Introduction:**

56 We now have an increasing understanding of the biophysical processes, that not only regulate  
57 the stability of the Earth-system thresholds, but also fuel the advancement of our society.  
58 Coupled with that, anthropogenic pressures continue to upsurge on the planet swiftly. Every  
59 single nation in this 21<sup>st</sup> century is going through a phase of interconnected causalities from  
60 degradation of the environment, deprivation in society and an ineffective economy.  
61 Anthropogenic role in geology and ecology has triggered the onset and rapid progress of a  
62 new epoch, the ‘Anthropocene’ (Steffen et al., 2011; Waters et al., 2016). Human deeds have  
63 pushed Earth-system into a “less biologically diverse, less forested, much warmer, and  
64 probably wetter and stormier state” (Steffen et al., 2007). To tackle this on a global scale, the  
65 concept of sustainable development has emerged, which is “development that meets the  
66 needs of the present without compromising the ability of future generations to meet  
67 their own needs” according to Brundtland Commission Report (1987). In 1992, United  
68 Nations Conference on Environment and Development (UNCED, Rio de Janeiro Earth  
69 Summit), Agenda 21, calls for sustainable development indicators (SDIs) to “provide solid  
70 bases for decision-making at all levels and to contribute to a self-regulating sustainability of  
71 integrated environment and development system”. United Nations has set 17 Sustainable  
72 Development Goals (SDGs) and 169 targets, emerging from Millennium Development Goals  
73 (MDGs) (Sachs, 2012) in 2015. This is the first UN approved framework that all nations have  
74 agreed towards a ‘broad and universal policy agenda’ that addresses environmental  
75 stewardship, human social deprivations and economic equity in an integrated way (UN  
76 General Assembly, 2015). These SDGs incorporate all three columns of sustainable  
77 development, i.e. environmental goals (climate action, life below water, life on land etc.),  
78 social goals (zero hunger, no poverty, gender equality, peace and justice and strong  
79 institutions etc.) and economic goals (reduced inequalities, decent work and economic growth  
80 etc.). Two major approaches have surfaced to track sustainability, (1) planetary boundaries  
81 (PBs) and (2) safe and just space (SJS) framework, under the doughnut economy (DE). In  
82 2009, Rockström et al. introduced a new concept of ‘planetary boundaries’ framework to  
83 ascertain ecological or environment thresholds and assess level of consumption of nine  
84 biophysical resources related to precarious Earth-system processes (climate change, rate of  
85 biodiversity loss, nitrogen and phosphorus cycles, stratospheric ozone depletion, ocean  
86 acidification, global freshwater use, change in land use, atmospheric aerosol loading and  
87 chemical pollution) whose transgressions risk altering the planet’s Holocene-like steady state

88 of the past 11,500 years ago (Rockström et al. 2009a, Rockström et al. 2009b) . Then Steffen  
89 et al. (2015) revised this framework (viz. change in biosphere integrity, land-system change,  
90 introduction of novel entities) towards a global scale aggregated evaluation of biophysical  
91 thresholds and consumption level. In 2012, Raworth devised 11 dimensions of social  
92 foundation based on United Nations Conference on Sustainable Development (Rio+20, 2012)  
93 (water, income, education, resilience, voice, jobs, energy, social equity, gender equality,  
94 health and food). This framework also has been updated in 2017 to 12 dimensions (viz. food,  
95 health, education, income and work, peace and justice, political voice, social equity, gender  
96 equality, housing, networks, energy, water) (Raworth, 2017a, 2017b). Dearing et al.'s (2014)  
97 case study of two Chinese localities (Erhai lake-catchment, Yunnan province and Shucheng  
98 County, Anhui province, China) is a bottom-up analysis which defines ecological processes  
99 and control variables based on local environmental conditions of study locations. Nykvist et  
100 al. (2013) used a top-down approach to realize national shares of four planetary boundaries  
101 (climate change, freshwater use, land-system change, and nitrogen) across 61 countries. Cole  
102 et al. (2014), using an assortment of both top-down and bottom-up approaches, designated  
103 sustainable development in terms of 'national barometer' of South Africa that included both  
104 planetary boundaries and doughnut economy frameworks. In this work, they had modified  
105 some indicators of both frameworks (arable land use, air pollution and marine harvesting  
106 under the PB framework; health care, household goods, safety of SJS framework). Hoff et al.  
107 (2014) quantified Europe's footprint using the PB framework. Dao et al. (2015) applied the  
108 PB framework to analyse the sustainability of Switzerland. Kahiluoto et al. (2015) assessed  
109 nitrogen and phosphorus boundaries of Ethiopia and Finland. Carpenter and Bennett (2011)  
110 have worked on improvising planetary boundary of phosphorus. Recently O'Neill et al.  
111 (2018) have downscaled these two frameworks to the nation-scale analysis of 150 nations  
112 accompanied with the ushering of new indicators (e.g. eHANPP, ecological footprint,  
113 material footprint, life satisfaction, healthy life expectancy, nutrition, social support,  
114 democratic quality etc.). More recently, Dao et al. (2018) have analysed the environmental  
115 limits of Switzerland in accordance with global limits based on the PB framework. They have  
116 analysed PBs related to climate change, ocean acidification, nitrogen and phosphorus loss,  
117 land cover anthropisation and biodiversity loss. Though they have used consumption-based  
118 indicators in their study, specific socio-economic developmental indicators are absent in their  
119 work. In this work, we have tried to unearth answers to the following: (1) How can we  
120 downscale both PBs and SJS framework to a national scale more precisely? (2) How can we  
121 comprehend changes in dimensions of PBs and SJS with time in order to contextualise their

122 contemporary values? (3) How can we utilize the past trends in biophysical consumptions  
123 (PBs) to project probable future consequences at a national scale? (4) How can we understand  
124 the interactions or connections among the dimensions of PBs and SJS? (5) How can we  
125 summarise and communicate SDG progress in such a way that focus national  
126 accomplishments and primaries? Our analysis measures the national performance of India on  
127 28 dimensions, comprising both PBS and SJS frameworks, and provides important outcomes  
128 of the relationship concerning biophysical resource use and well-being for India. Our work  
129 has been explained herein few steps, (1) we present our methodology and results of our case  
130 study on India, (3) we explore interlinks between dimensions of PBs and SJS, (4) we project  
131 probable future scenario of biophysical consumption for India, (5) we discuss applicability of  
132 PB-SJS framework as a tool in policymaking with local-regional-global links and (6) finally,  
133 we discuss limitations of our study and scopes and provisions of further research  
134 improvements. In a simple way, we have tried to understand how close India to its ‘safe’  
135 environmental boundaries are (i.e. national biophysical ceiling) (for climate change,  
136 freshwater use, arable land use, nitrogen use, phosphorus use, ecological and material  
137 footprint) and what proportion of the population lives below ‘just’ social floor (i.e. national  
138 social foundation) (for education, energy, food, gender equality, health, housing, income and  
139 work, networks, peace and justice, political voice, social equity, water and sanitation). This  
140 study is to be used as a study of cautionary warning that exposes the risks that might deter  
141 India’s ability to meet its national sustainable development goals as per UN SDG 2015  
142 standard.

### 143 **Data and Method:**

#### 144 **a. Biophysical Indicators:**

145 Though we have mostly adopted Rockström et al.’s (2009b) and Steffen et al.’s (2015)  
146 approach of planetary boundaries framework, we have adjusted all of the indicators and  
147 boundaries to ensemble national scale and circumstances of India. We have used five  
148 indicators as per updated planetary boundaries framework of Steffen et al. (2015) (climate  
149 change, nitrogen flow, phosphorus flow, land-system change and freshwater use) and two of  
150 O’Neill et al.’s (2018) (ecological and material footprint).

151 **Climate change:** Rockström et al. (2009b) have calculated climate change boundary based on  
152 global ‘atmospheric carbon dioxide concentration (parts per million by volume)’ and ‘change  
153 in radiative forcing i.e. energy imbalance at top-of-atmosphere ( $W m^{-2}$ )’. Cole et al. (2014)  
154 and O’Neill et al. (2018) have used ‘annual direct CO<sub>2</sub> emissions (Mt CO<sub>2</sub>)’ and annual per

155 capita CO<sub>2</sub> emission (t CO<sub>2</sub>), respectively. We have measured climate change in terms of  
156 GHG emission per capita per year. According to Emissions Gap Report (UNEP, November  
157 2017), ‘emissions of all greenhouse gases should not exceed 42 GtCO<sub>2</sub>-e in 2030 if the 2°C  
158 target is to be attained with higher than 66 per cent chance.’ Hence, we have divided 42  
159 GtCO<sub>2</sub>-e with world population to get per capita global scale boundary of 5.75t CO<sub>2</sub>-e year<sup>-1</sup>  
160 (2014).

161 **Freshwater use:** Rockström et al. (2009b) have estimated planetary boundary of freshwater  
162 use is the maximum withdrawal of 4000 km<sup>3</sup> y<sup>-1</sup> blue water from rivers, lakes, reservoirs, and  
163 renewable groundwater stores. Steffen et al. (2015) and O’Neill et al. (2018) have followed  
164 this estimate, while Cole et al. (2014) have used annual consumption of available freshwater  
165 resources (Mm<sup>3</sup> per year) We have divided the most accepted value of 4000 km<sup>3</sup> y<sup>-1</sup> water  
166 with world population to get per capita global scale boundary of 574.86 km<sup>3</sup> y<sup>-1</sup> (2010).

167 **Arable land use:** According to Rockström et al. (2009b), the planetary boundary of land use  
168 is less than 15% of global ice-free land cover converted to cropland per year (which is 1995  
169 Mha). Steffen et al. (2015) have measured this in terms of ‘area of forested land as % of  
170 original forest cover’ and advocated to maintain a minimum of 75% of global original forest  
171 cover (for tropical, temperate and boreal 85%, 50% and 85%, respectively). Cole et al. (2014)  
172 have used ‘rain-fed arable land converted to cropland (%)’. O’Neill et al. (2018) have used  
173 ‘embodied human appropriation of net primary productivity (eHANPP)’ (t C per capita per  
174 year). We have divided globally available and safely maximum usable land of 1995 Mha with  
175 world population to get per capita global scale land use boundary of 0.27ha year<sup>-1</sup> (2015).

176 **Nitrogen use:** Rockström et al. (2009b) have measured this boundary in terms of ‘amount of  
177 N<sub>2</sub> removed from the atmosphere for human use (millions of tonnes y<sup>-1</sup>)’ (which was 35  
178 million tonnes y<sup>-1</sup>). According to Steffen et al. (2015), the planetary boundary of global  
179 nitrogen flow is 62 Tg N y<sup>-1</sup> from industrial and intentional biological fixation. O’Neill et al.  
180 (2018) have followed Steffen et al.’s method for this. Cole et al. (2014) have used the  
181 nitrogen application rate of maize production (kg N ha<sup>-1</sup>). We have divided 62 Tg N y<sup>-1</sup> with  
182 world population to get per capita global scale boundary of 8.4kg N year<sup>-1</sup> per capita (2015).

183 **Phosphorus use:** Rockström et al. (2009b) have measured this boundary in terms of ‘quantity  
184 of phosphorus flowing into the ocean (millions of tonnes y<sup>-1</sup>)’ (which gave global boundary  
185 of 11 million tonnes y<sup>-1</sup>). But, according to Steffen et al. (2015), the planetary boundary of  
186 global phosphorus flow is 6.2 Tg N y<sup>-1</sup> mined and applied to erodible (agricultural) soils.  
187 O’Neill et al. (2018) have followed the same method as Steffen et al.’s for this. Cole et al.  
188 (2014) have measured it in terms of ‘total phosphorus concentration in dams (mg/L)’. We

189 have divided 6.2 Tg N y<sup>-1</sup> with world population to get per capita global scale boundary of  
 190 0.84kg P year<sup>-1</sup> (2015).

191 **Ecological footprint (EF)**: This is used to measure how much biologically productive land  
 192 and sea area a population requires to produce the biotic resources it consumes as well as  
 193 absorb the CO<sub>2</sub> emissions it generates, using prevailing technology and resource management  
 194 practices (Borucke et al., 2013). This is an aggregation of six components (cropland, forest  
 195 land, fishing grounds, grazing land, built-up land, and carbon land), and can be compared to  
 196 biocapacity (i.e. total available area of biologically productive land and sea area). O’Neill et  
 197 al. (2018) first used this ecological footprint in the context of the planetary boundaries  
 198 framework. According to Global Footprint Network, 12 billion ha biologically productive  
 199 land and sea area is available in the world. We have divided 12 billion ha with world  
 200 population to get per capita global scale boundary of 1.66gha year<sup>-1</sup> (2013).

201 **Material footprint (MF)**: According to Wiedmann et al. (2015), it (also known as raw  
 202 material consumption, RMC), measures the amount of used material extraction (minerals,  
 203 fossil fuels, and biomass) associated with the final demand for goods and services,  
 204 irrespective of the location of the extraction. It includes the embodied raw materials related to  
 205 imports and exports and is, therefore, a fully consumption-based measure. The global  
 206 material footprint has been estimated at 70 Gt y<sup>-1</sup> (i.e. 10.5 ton per capita in 2008, by  
 207 Wiedmann et al. 2015), and it was capped to 8 ton per capita has been suggested as a  
 208 sustainable level, by Dittrich et al. (2012). According to Dittrich et al. (2012), global material  
 209 extraction should not exceed ~50 Gt y<sup>-1</sup>, based on the material used in 2000 (50.8 Gt). We  
 210 have divided 50 Gt y<sup>-1</sup> with world population to get per capita global scale boundary of 7.18t  
 211 year<sup>-1</sup> (2010).

212 These dimensions along with their respective indicators, boundary, current status, data source  
 213 and boundary crossing time (at BAU rate) are explained in Table 1.

| No. | Dimension (related SDG) | Indicator | Boundary (global, per capita) | Year | Current Status | Change since initial year (+ increase, - decrease) | Data Source | Boundary crossing time (BAU) |
|-----|-------------------------|-----------|-------------------------------|------|----------------|----------------------------------------------------|-------------|------------------------------|
|     |                         |           |                               |      |                |                                                    |             |                              |

|   |                          |                                                                                                 |                                                    |             |                                  |          |                                         |             |
|---|--------------------------|-------------------------------------------------------------------------------------------------|----------------------------------------------------|-------------|----------------------------------|----------|-----------------------------------------|-------------|
| 1 | Climate change (SDG 13)  | GHG emissions including Land-Use Change and Forestry (t CO <sub>2</sub> -e) Per Capita Per Year | 5.75t CO <sub>2</sub> -e year <sup>-1</sup> (2014) | 1990 - 2014 | 2.47 t CO <sub>2</sub> -e (2014) | +46.95 % | Climate Analysis Indicators Tool (CAIT) | 2045-2047   |
| 2 | Freshwater use (SDG 6)   | Total water withdrawal (m <sup>3</sup> ) Per Capita Per Year                                    | 574.86m <sup>3</sup> year <sup>-1</sup> (2010)     | 1973 - 2012 | 602.3 m <sup>3</sup> (2010)      | +3.07%   | Aquastat                                | 2007-2008   |
| 3 | Arable land use (SDG 15) | Agricultural land area (ha) Per Capita Per Year                                                 | 0.27ha year <sup>-1</sup> (2015)                   | 1961 - 2015 | 0.13 ha (2015)                   | -64.61%  | FAOSTA T, World Bank                    | 2035        |
| 4 | Nitrogen use (SDG 14)    | Nutrient nitrogen N use (kg) Per Capita Per Year                                                | 8.4kg N year <sup>-1</sup> (2015)                  | 2002 - 2015 | 14.07 kg N (2015)                | +27.51 % | FAOSTA T                                | 2002        |
| 5 | Phosphorus use (SDG 14)  | Nutrient phosphate P <sub>2</sub> O <sub>5</sub> (kg) Per Capita Per Year                       | 0.84kg P year <sup>-1</sup> (2015)                 | 2002 - 2015 | 5.65 kg P (2015)                 | +30.54 % | FAOSTA T                                | Before 2002 |
| 6 | Ecological footprint     | Ecological footprint                                                                            | 1.66gha year <sup>-1</sup>                         | 1961 -      | 1.06 gha                         | +43.87 % | Global Footprint                        | 2020-2025   |



|   | (EF)<br>(SDG 14,<br>15)                   | (gha) Per<br>Capita Per<br>Year                        | (2013)                                | 2013              | (2013)           |             | Network<br>(GFN) |               |
|---|-------------------------------------------|--------------------------------------------------------|---------------------------------------|-------------------|------------------|-------------|------------------|---------------|
| 7 | Material<br>footprint<br>(MF)<br>(SDG 12) | Material<br>footprint<br>(t) Per<br>Capita Per<br>Year | 7.18t<br>year <sup>-1</sup><br>(2010) | 2000<br>-<br>2010 | 3.56 t<br>(2010) | +30.61<br>% | UNData<br>(UNSD) | 2025-<br>2030 |

214 Table 1: Dimensions and indicators of the ecological ceiling (Planetary boundaries concept)  
215 for India

216 Boundaries, that have not yet been crossed, are shown in green and yellow represents  
217 boundaries that have been crossed. Boundaries that have been crossed and reached a critical  
218 level that deserves serious attention are represented in red.

219 **b. Social development Indicators:**

220 We have followed framework consisting 12 dimensions of Raworth (2017a).

221 **Education:** SDG 4 targets on ensuring inclusive and equitable quality education and  
222 promotion of lifelong learning opportunities for all. We have chosen 3 indicators to  
223 understand primary, secondary and adult education (adult literacy rate, children remained in  
224 school (of primary school age) and secondary school enrolment) to reflect achievements and  
225 outcomes across diverse population age groups. We have focused on these for three reasons.  
226 First, primary education is the very basic one should have, especially to be able to cope up  
227 with a growing economy (India). Second, without receiving a comprehensive subject- or  
228 skill-oriented knowledge during secondary school years, the young population might become  
229 ill-equipped for tertiary education or the workforce, also can be engaged to activities with  
230 negative effects on social well-being (as - radicalization by militants, unplanned teenage  
231 pregnancy, juvenile crimes etc.). Third, education paradigm was not even sufficiently  
232 developed in India a few decades ago for most of the people (i.e. lack of access to educational  
233 institutions, education-aiding equipment and technology etc.). Therefore, monitoring adult  
234 literacy becomes important for both themselves and their next generations. We have used the  
235 data from the World Bank's World Development Indicators (WDI). Similar to the other  
236 percentage indicators, a threshold of 10% or less was chosen for children out of the school of  
237 primary school age and 90% or more was chosen for secondary school enrolment and adult

238 literacy rate as - universal access to education does not imply 100% enrolment, especially for  
239 countries like India.

240 **Energy:** SDG 7 focuses on ensuring access to affordable, reliable, sustainable and clean  
241 energy for all. About 1 billion people currently do not have access to electricity. 3 billion  
242 people rely on polluting fuel (like – fuelwood, charcoal, crop residue, animal dung, dry  
243 leaves) to cook food, which in turn resulting in 4 million premature deaths per year, mostly  
244 among women and children, that are due to household air pollution (SDG 7 tracking report,  
245 2018). Our assessment of deprivations in access to energy includes both electricity and the  
246 quality of (clean) cooking facilities. We have measured energy using two indicators, (1)  
247 ‘access to electricity (% of populations)’ and (2) ‘access to clean fuels and technologies for  
248 cooking (% of the population)’, obtained from the World Bank’s WDI. The threshold for  
249 energy was set at 90% or more for both indicators.

250 **Food:** The target of SDG 2 is ending hunger, achieving food security and improved nutrition  
251 for all. We have measured social development related to food using two indicators, (1)  
252 ‘prevalence of undernourishment (% of the population)’, and (2) ‘average calorific intake of  
253 food & drink (kcal/capita/day)’. The first indicator, from the World Bank's WDI, is selected  
254 keeping in mind the occurrence of undernourishment and malnutrition in almost all of the  
255 developing countries, like – India. The second indicator (by UN FAO) is an average calorific  
256 intake of food and drink, with unit - kilocalories (kcal) per capita per day. The physiological  
257 requirements for an average adult remain between 2100 and 2900 kcal per day (for average  
258 women and men during moderate physical activity). However, this calorific requirement  
259 range exceeds for individuals associated with heavy manual labour or athletic activity (Smil,  
260 V., 2000). We have used 2700 kcal or more per capita day  $y^{-1}$  as the desired threshold.

261 **Gender Equality:** The focus of SDG 5 is achieving gender equality via empowering all  
262 women. It would be ideal to assess the extent of gender inequality to understand women and  
263 men’s roles and status in political and economic life. We have measured this using one  
264 indicator - ‘proportion of seats held by women in national parliaments (%)’ from the World  
265 Bank's World Development Indicators. The indicator value is calculated such that if women  
266 held exactly half of all parliamentary seats (i.e. 50%), that should be non-biased to both  
267 genders. Thus, achieving 50% seats in parliament has been taken as the desired threshold.

268 **Health:** Ensuring healthy lives and promoting well-being for all at all ages is the focus of  
269 SDG 3. We have used two indicators to assess shortfalls in access to health care in India: (1)  
270 ‘life expectancy at birth, total (years)’ and (2) ‘mortality rate, <5 years (per 1,000 live births)’  
271 from the World Bank's WDI, both selected for being recognized proxies for wider health

272 outcomes. First indicator, life expectancy at birth indicates the number of years a newborn  
273 infant would live if prevailing patterns of mortality at the time of its birth were to stay the  
274 same throughout its life. According to the Human Development Report (UNDP 2015), 70  
275 years or more life expectancy at birth is selected here as a desirable threshold. The second  
276 indicator, under-five year mortality rate is the probability per 1,000 that a newborn baby will  
277 die before reaching age five, based on age-specific mortality rates of the specified year.  
278 According to WHO (2015), the international target for all countries to reduce under-five  
279 years age mortality to at least as low as 25 per 1,000 live births by 2030. Thus, 25 or less per  
280 1000 live births has been set as the desired threshold here.

281 **Housing:** SDG 11 focus on making cities and human settlements inclusive, safe, resilient and  
282 sustainable. We have measured it with ‘population living in slums (% of urban population)’  
283 from WDI (World Bank). Slum housing is defined as having at least one of the following  
284 four characteristics - lack of access to improved drinking water, lack of access to improved  
285 sanitation, overcrowding (>3 persons per room) and dwellings made of non-durable material.  
286 As most of the Indian people presently live in rural areas, an indicator that measures  
287 deprivations in conditions in rural houses of India would have been more appropriate, along  
288 with the used indicator. We have set the threshold at 10% or less of urban population living in  
289 slums.

290 **Income and Work:** SDG 1 focus on ending poverty in all its forms everywhere. Promoting  
291 sustained, inclusive, sustainable economic growth full and productive employment and  
292 decent work for all is the goal of SDG 8. We have measured income with (1) ‘poverty  
293 headcount ratio at \$1.90 a day (2011 PPP) (% of population)’ and work with (2)  
294 ‘unemployment, youth total (% of total labour force, 15-24 years)’ both from WDI (World  
295 Bank). The first indicator is defined as the poverty threshold at \$1.90 a day using 2011  
296 international prices. Although the goal is having 100% of the population living above the  
297 \$1.90 a day line, we have used a threshold value of 95% in our analysis. The second indicator  
298 is youth unemployment which measures the proportion of young people (aged 15-24 years)  
299 who are seeking but unable to find work (International Labour Organization, ILO estimation).  
300 The unemployment rate means the share of the labour force that is without work but available  
301 for and seeking employment. We have used 94% or more people are employed, i.e. 6% or  
302 less unemployed people below this line is the desired threshold for this indicator.

303 **Networks:** SDG 9 focus on building resilient infrastructure, promoting inclusive and  
304 sustainable industrialization and fostering innovation. Under this goal, target 9.c. focus on  
305 significantly increasing access to information and communications technology and strive to

306 provide universal and affordable access to the Internet in the least developed countries.  
307 Network was measured using ‘individuals using the internet (% of the population)’ provided  
308 by WDI of the World Bank. Digital communications networks are important means of  
309 generating opportunity, building community and increasing resilience. We have set here 90%  
310 or more of the population have access to the internet as the desired threshold for this  
311 indicator.

312 ***Peace & Justice:*** UN SDG 16 focus on promoting peaceful and inclusive societies for  
313 sustainable development, provide access to justice for all and build effective, accountable and  
314 inclusive institutions at all levels. We have used two indicators to assess shortfalls in justice  
315 and peace, (1) corruption perceptions index (CPI), (provided by Transparency International)  
316 and (2) ‘intentional homicides (per 100,000 people)’ (from WDI) respectively. The first  
317 indicator, corruption perception index scores countries according to how corrupt their public  
318 sector is perceived to be, on a scale of 0 to 10 (up to 2011) and 0 to 100 (2012 onwards) (i.e.  
319 highly corrupt to very clean). We have set the desired threshold of 5 or less (up to 2011) and  
320 50 or less (2012 onwards). The second indicator defines the rate of intentional homicide as  
321 unlawful death purposefully inflicted on a person by another person. The threshold is set at  
322 100 or fewer homicide deaths per 100,000 population per year.

323 ***Political Voice:*** Under SDG 16, target 16.7 aims for ensuring responsive, inclusive,  
324 participatory and representative decision-making at all levels. We have measured political  
325 voice using voice & accountability index (VAI), provided as a component of the World  
326 Bank’s World Governance Indicators (WGI). This index is scored on a scale of 0 to 1 (i.e.  
327 very poor performance to very high performance) and includes measures of democracy,  
328 vested interests, accountability of public officials, human rights, and freedom of association.  
329 The threshold is set at 0.5 or less on this indicator.

330 ***Social Equity:*** SDG 10 focus on reducing inequality within and among the countries. The  
331 shortfall of social equity is measured with national income inequalities. We have measured  
332 social equity using the Gini coefficient provided by the World Income Inequality Database  
333 3.4 (WIID 3.4). Evidence for high-income countries suggests that more equal societies have  
334 fewer health and social problems than less equal ones. The threshold was chosen of 70 of 0-  
335 100 scale of Gini index of 0.30.

336 ***Water & Sanitation:*** SDG 6 focus on ensuring availability and sustainable management of  
337 water and sanitation for all. Deprivations in access to water and sanitation services are  
338 assessed on the basis of two widely used indicators, (1) ‘improved sanitation facilities (% of  
339 the population with access)’ and (2) ‘improved water source (% of the population with

340 access)' from the World Bank's WDI. The sanitation indicator measures the percentage of the  
 341 population using improved sanitation facilities. Although it is preferable that 100% of the  
 342 population should have access to improved sanitation facilities, we have chosen a threshold  
 343 of 90% for this indicator in recognition of the fact that most of the Indian population are  
 344 located in rural areas. Inadequate access to water denotes the proportion of people who do not  
 345 have access to an improved drinking water source, like - piped household water, public taps,  
 346 protected wells and springs, or collected rainwater etc. We have set the threshold for this  
 347 indicator as 90% or more people in India have access (i.e. 10 or fewer people do not have  
 348 access) to improved water source.  
 349 These dimensions along with their respective indicators, threshold, current status, data source  
 350 and threshold meeting time (at BAU rate) are explained in Table 2.

| No. | Dimension         | Indicator                                               | Threshold                            | Year      | Current Status | Change since initial year (+ increase, - decrease) | Data Source | Threshold meeting time (BAU) |
|-----|-------------------|---------------------------------------------------------|--------------------------------------|-----------|----------------|----------------------------------------------------|-------------|------------------------------|
| 1   | Education (SDG 4) | Children out of school (% of primary school age)        | Less than 10% children out of school | 1970-2015 | 2.26% (2013)   | -36.42%                                            | WDI         | 2003-2004                    |
|     |                   | Literacy rate, adult total (% of people ages ≥15 years) | 90% literate of adult population     | 1970-2016 | 69.3% (2012)   | +28.53%                                            | WDI         | 2030-2035                    |
|     |                   | School enrolment, secondary (% gross)                   | 90% enrolment in secondary           | 1970-2015 | 73.97% (2015)  | +49.94%                                            | WDI         | 2030-2040                    |

|   |                         |                                                                          |                                                                       |            |                |          |          |                 |
|---|-------------------------|--------------------------------------------------------------------------|-----------------------------------------------------------------------|------------|----------------|----------|----------|-----------------|
|   |                         |                                                                          | school                                                                |            |                |          |          |                 |
| 2 | Energy (SDG 7)          | Access to Electricity (% of Populations)                                 | 90% people have electricity access                                    | 199 0-2014 | 79.17 % (2014) | +31.1 %  | WDI      | 2020-2025       |
|   |                         | Access to clean fuels and technologies for cooking (% of the population) | 90% of people have access to clean fuels and technologies for cooking | 200 0-2014 | 34.16 % (2014) | +9.69 %  | WDI      | 2090-2100       |
| 3 | Food (SDG 2)            | Average calorific intake of food & drink (kcal/capita/day)               | 2700 calories per person per day                                      | 196 1-2013 | 2459 (2013)    | +18.25 % | FAOSTA T | 2030-2035       |
|   |                         | Prevalence of undernourishment (% of population)                         | <5% people of population are undernourished                           | 200 0-2015 | 14.5 % (2015)  | -2.7%    | WDI      | 2035-2045       |
| 4 | Gender Equality (SDG 5) | Proportion of seats held by women in national parliaments (%)            | 50% of seats held by women in national parliaments                    | 199 7-2017 | 11.8 % (2017)  | +4.6%    | WDI      | Not before 2100 |
| 5 | Health (SDG)            | Life expectancy at                                                       | Life expectancy                                                       | 196 0-     | 68.33 y        | +39.75 % | WDI      | 2020-2025       |

|   |                               |   |                                                                                   |                                                    |           |               |         |                                 |                 |
|---|-------------------------------|---|-----------------------------------------------------------------------------------|----------------------------------------------------|-----------|---------------|---------|---------------------------------|-----------------|
|   | 3)                            |   | birth, total (years)                                                              | <70 years at birth                                 | 2015      | (2015)        |         |                                 |                 |
|   |                               |   | Mortality rate, <5 years (per 1,000 live births)                                  | Mortality rate $\geq 25$ per 1000 births           | 1960-2016 | 43 (2016)     | -82.49% | WDI                             | 2015-2020       |
| 6 | Housing (SDG 11)              |   | Population living in slums (% of urban population)                                | <10% of population living in slums                 | 1990-2014 | 24% (2014)    | -30.9%  | WDI                             | 2020-2025       |
| 7 | Income (SDG 1) & Work (SDG 8) | x | Poverty headcount ratio at \$1.90 a day (2011 PPP) (% of population) Tier – I     | 5% or less of people earn less than \$1.90 per day | 1991-2015 | 21.2% (2011)  | -32.7%  | WDI                             | 2030-2040       |
|   |                               | x | Unemployment, youth total (% of total labor force 15-24y) (modelled ILO estimate) | 94% of employment (6% unemployment)                | 1991-2017 | 10.2% (2017)  | +1.2%   | WDI                             | Not before 2100 |
| 8 | Networks (SDG 9.c)            | x | Individuals using the Internet (% of population)                                  | 90% of population use internet                     | 1990-2016 | 29.55% (2016) | +29.55% | WDI                             | 2090-2100       |
| 9 | Peace & Justice (SDG 16)      | x | Corruption Perceptions Index (CPI)                                                | Score $\leq 5$ out of 10 in CPI (up to 2011),      | 1995-2015 | 38 (2015)     | ?       | Transparency International (TI) | Not before 2100 |

|    |                                            |    |                                                                          |                                                                      |                       |                         |                 |         |                       |
|----|--------------------------------------------|----|--------------------------------------------------------------------------|----------------------------------------------------------------------|-----------------------|-------------------------|-----------------|---------|-----------------------|
|    |                                            |    | Score $\leq 50$<br>out of 100<br>in CPI<br>(from 2012<br>onwards)        |                                                                      |                       |                         |                 |         |                       |
|    |                                            | x  | Intentional<br>homicides<br>(per 100,000<br>people)                      | Homicide<br>rate 100 or<br>less                                      | 199<br>5-<br>201<br>5 | 3.2<br>(2014<br>)       | -<br>26.71<br>% | WDI     | Not<br>before<br>2100 |
| 10 | Political<br>Voice<br>(SDG<br>16.7)        | xv | Voice &<br>Accountabilit<br>y Index<br>(VAI)                             | Score $\leq 0.5$<br>out of 1.0 in<br>VAI                             | 199<br>6-<br>201<br>6 | 0.41<br>(2013<br>)      | -<br>12.76<br>% | WGI     | Not<br>before<br>2100 |
| 11 | Social<br>Equity<br>(SDG<br>10)            | xv | Gini index                                                               | 70 on (0-<br>100) scale<br>on Gini<br>index of<br>0.30               | 196<br>0-<br>201<br>5 | 35.15<br>(2011<br>)     | +7.25<br>%      | WIID3.4 | Not<br>before<br>2100 |
| 12 | Water<br>&<br>Sanitati<br>on<br>(SDG<br>6) | x  | Improved<br>sanitation<br>facilities (%<br>of population<br>with access) | 90% people<br>have access<br>to improved<br>sanitation<br>facilities | 199<br>0-<br>201<br>5 | 39.6<br>%<br>(2015<br>) | +22.8<br>%      | WDI     | 2065-<br>2070         |
|    |                                            | x  | Improved<br>water source<br>(% of the<br>population<br>with access)      | 90% of<br>people have<br>access to<br>improved<br>water<br>resource  | 199<br>0-<br>201<br>5 | 94.1<br>%<br>(2015<br>) | +23.6<br>%      | WDI     | 2010                  |

351

352 Table 2: Dimensions and indicators of social foundation (Safe and Just space, SJS of  
353 Doughnut economy concept) for India.



354 Green represents indicators that are going to meet or have already met threshold within UN  
355 SGD target time (2030). Indicators that are going meet a few years after that time are shown  
356 in yellow and which are going to meet the desired threshold many years after 2030 are shown  
357 in red.

358 To establish, causation between each of biophysical indicators on each of social development  
359 indicators and to have a better overview on the associative nature of each pair, we conducted  
360 an OLS regression with biophysical indicators as independent variables and each of social  
361 development indicators as the dependent variable (Supplementary Table) .

### 362 **c. Future scenario:**

363 As we have calculated all the biophysical indicators on per capita basis, it is possible to  
364 project probable future scenario of total consumption. We collected future population  
365 projection (2015-2050) data (median range prediction value of 50%) of India from UN DESA  
366 (2017 Revision) and then multiplied it with per capita consumption of dimensions of PBs.  
367 We have calculated three projection series for each dimension of PBs, (1) with the lowest  
368 value that has happened in past year, (2) highest value that has happened in past year and (3)  
369 business-as-usual scenario with latest available data.

### 370 **Results:**

#### 371 **a. Biophysical Indicators:**

372 In India, GHG emission, freshwater use, nitrogen use, phosphorus use, ecological footprint  
373 and material footprint have increased 46.95% (from 1990), 3.07% (from 1973), 27.51%  
374 (from 2002), 30.54% (from 2002), 43.87% (from 1961) and 30.61% (from 2000),  
375 respectively. On the other hand, arable land use has decreased 64.61% (from 1961) in India.  
376 India has already crossed three of seven dimensions of per capita biophysical boundaries  
377 (freshwater use – 2007-2008, nitrogen use – 2002, and phosphorus use – before 2002). If  
378 everything remains unchanged, i.e. BAU scenario, India would cross the rest of four  
379 dimensions of PB within 2045 (climate change – 2045-2047, arable land use – 2035,  
380 ecological footprint – 2020-2025, material footprint – 2025-2030). Three PBs have exceeded  
381 their boundaries by 4.5% (freshwater use), 40.3% (nitrogen use) and 85.1% (phosphorus use).  
382 Remaining four PBs are within 42.9% (climate change), 51.85% (arable land use), 36.1%  
383 (ecological footprint) and 50.5% (material footprint) of exceeding their boundaries (Fig. 1).

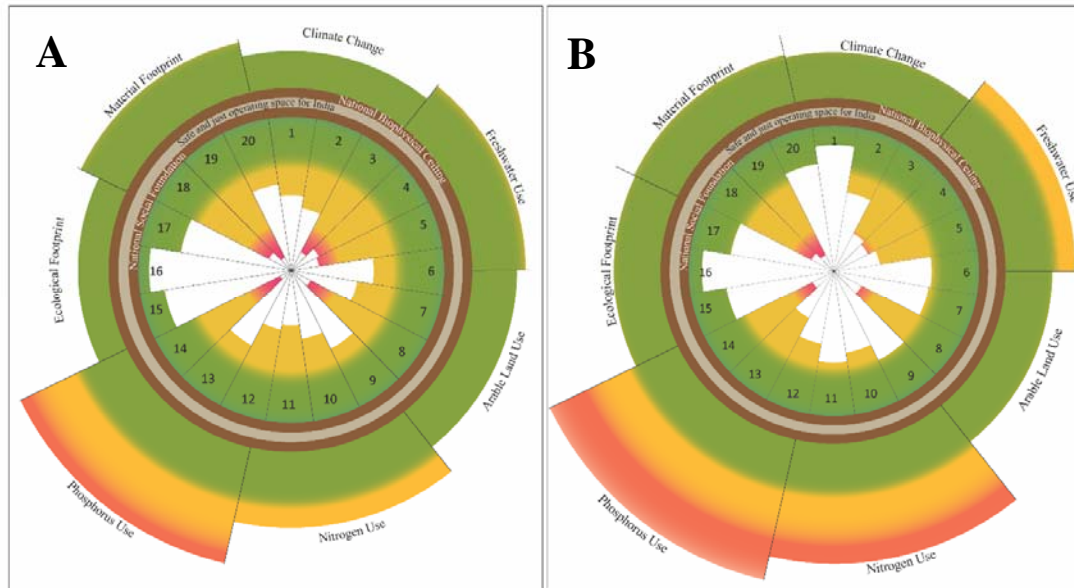

384

385 Fig. 1. Trends in national barometer for sustainable development in India.

386 Seven national dimensions of biophysical stress established over national biophysical ceiling  
387 outwardly projected and twenty indicators composing twelve dimensions of social  
388 deprivation established under national social foundation inwardly projected for India. A and  
389 B represent the status of sustainable development of India in 2000 and 2011 respectively.  
390 Biophysical indicators are climate change, freshwater use, arable land use, nitrogen use,  
391 phosphorus use, ecological footprint and material footprint. Indicators of social development  
392 are – (1) children out of school of primary school age, (2) adult literacy rate, (3) secondary  
393 school enrolment, (4) access to electricity, (5) access to clean fuels and technologies for  
394 cooking, (6) average calorific intake of food and drink, (7) undernourishment, (8) proportion  
395 of seats held by women in national parliaments, (9) life expectancy at birth, (10) mortality  
396 rate under 5 years, (11) urban population living in slums, (12) poverty headcount ratio at  
397 \$1.90 a day, (13) youth unemployment, (14) individuals using the internet, (15) corruption  
398 perception index, (16) intentional homicides, (17) voice and accountability index, (18) Gini  
399 index, (19) improved sanitation facilities and (20) improved water source. Twelve dimensions  
400 of the social foundation are education 1-3, energy 4-5, food 6-7, gender equality 8, health 9-  
401 10, housing 11, income and work 12-13, networks 14, peace and justice 15-16, political voice  
402 17, social equity 18, water and sanitation 19-20. Green indicates safe operating space for  
403 biophysical indicators and thresholds for indicators of social development. Yellow indicates  
404 the zone of increasing impact for biophysical indicators and zone of increasing deprivation

405 for indicators of social development. Red indicates the zone of high risk of serious impact for  
406 biophysical indicators and zone of the high level of deprivation for indicators of social  
407 development. The area between the chocolate rings is the safe and just operating space for  
408 sustainable development in India.

409 **b. Social development Indicators:**

410 In India, primary school age children out of school, undernourished population, mortality rate  
411 in less than 5y age children (per 1000 live births), urban slum living population, poverty  
412 headcount ratio, intentional homicides (per 1,00,000 people), voice and accountability index  
413 score have decreased 36.42% (from 1970), 2.7% (from 2000), 82.49% (from 1960), 30.9%  
414 (from 1990), 32.7% (from 1981), 26.71% (from 1995) and 12.76% (from 1996), respectively.  
415 On the other hand, adult literacy rate, secondary school enrolment, access to electricity,  
416 access to clean fuels and technologies for cooking, average calorific intake of food & drink,  
417 seats held by women in national parliament, life expectancy at birth, youth unemployment,  
418 internet using population, social equity, improved sanitation facilities using population and  
419 improved water source availing population have increased 28.53% (from 1970), 49.94%  
420 (from 1970), 31.1% (from 1990), 9.69% (from 2000), 18.25% (from 1961), 4.6% (from  
421 1997), 39.75% (from 1960), 1.2% (from 1991), 29.55% (from 1990), 7.25% (from 1960),  
422 22.8% (from 1990) and 23.6% (from 1990), respectively. For the 12 dimensions of SJS  
423 framework, only one (peace and justice) has been non-deprived. Of 20 indicators that we  
424 analysed for India, only five were not socially deprived, which are – ‘children out of school  
425 (% of primary school age)’, ‘CPI’, ‘intentional homicides (per 100,000 people)’, ‘VAI’ and  
426 ‘improved water source (% of population with access)’. However, among the rest 15  
427 indicators, only one is getting more distant from the threshold, namely youth unemployment  
428 of 15-24y; all the remaining 14 indicators were coming are closing in towards their respective  
429 thresholds. Five of the 14 indicators are showing much improvement over the years  
430 (Secondary school enrolment, access to electricity, life expectancy at birth, Mortality rate of  
431 <5 years and urban population living in slums) and in a BAU scenario, they might reach their  
432 thresholds within a few years. Most deprivation exists for eight dimensions - energy, gender  
433 equality, income and work, networks, peace and justice, political voice, social equity, water  
434 and sanitation. Least deprivation exists for three dimensions – education, health, housing.

435 Thus, it is clear that exceeding the environmental safe limits have serious consequences for  
436 the national security of energy, food, water, job and health; which in turn, potentially, might  
437 affect the national economy and international trades. So, it is evident that national policy

438 decisions on socio-economic development should take environmental costs into account if  
439 these need to be sustainable.

440 Trends of changes in both biophysical and social development indicators, over time, are  
441 shown in Fig. 2.

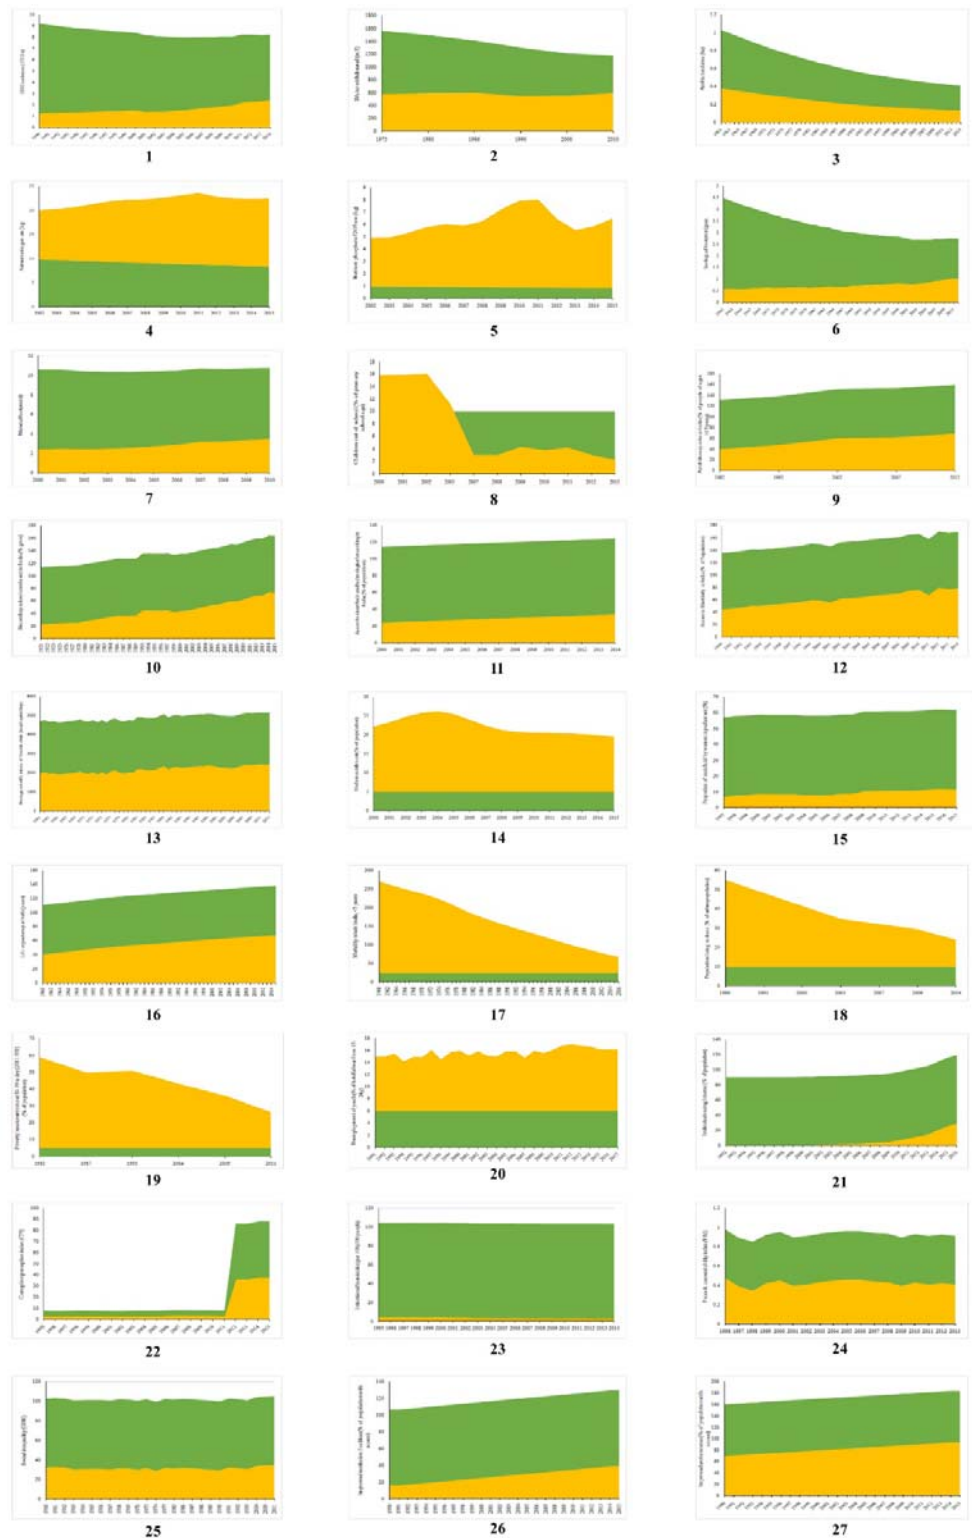

442

443 Fig. 2. Changes in per capita biophysical indicators (1-7) and indicators of social  
444 development (8-27) of sustainable development in India with time.

445 Green indicates global per capita boundaries for biophysical indicators and thresholds for  
446 indicators of social development. Yellow indicates values of indicators for India.

447 Biophysical indicators are - (1) GHG emission, (2) water withdrawal, (3) arable land, (4)  
448 nitrogen use, (5) phosphorus use, (6) ecological footprint and (7) material footprint.  
449 Indicators for social development are - (8) children out of school of primary school age, (9)  
450 adult literacy rate, (10) secondary school enrolment, (11) access to electricity, (12) access to  
451 clean fuels and technologies for cooking, (13) average calorific intake of food and drink, (14)  
452 undernourishment, (15) proportion of seats held by women in national parliaments, (16) life  
453 expectancy at birth, (17) mortality rate under 5 years, (18) urban population living in slums,  
454 (19) poverty headcount ratio at \$1.90 a day, (20) youth unemployment, (21) individuals using  
455 the internet, (22) corruption perception index, (23) intentional homicides, (24) voice and  
456 accountability index, (25) Gini index, (26) improved sanitation facilities and (27) improved  
457 water source.

458 **c. A 'safe and just' India in 2050:**

459 If we can cap GHG emission at lowest per capita level (i.e. 1990 level) of India, even with  
460 grown population projection level of 2050, GHG emission can be lowered 31.98%. But at the  
461 present rate (which is also the highest per capita rate), GHG emission will increase 22% in  
462 2050. At the present rate (2010) of per capita water use, in 2050 it will increase 23.83%.  
463 Likewise, at a high rate (1986), it will even increase more (24.62%) in 2050. But, if India can  
464 attain the lowest per capita water use rate (1990), even with the 2050 population level, the  
465 increase will be lower (16.83%). In 2050, nitrogen use is going to increase by 23% (at BAU  
466 rate) or even 26.64% (at highest per capita rate of 2011). But it can be lowered to 5.85%  
467 decrease if the lowest per capita rate (of 2002) can be attained in 2050. Phosphorus use is  
468 going to increase 31.03% (at BAU rate) or even 45.48% (at highest per capita rate of 2011) in  
469 2050. However, it can be decreased by 0.7% from the present level in 2050 if India can attain  
470 the lowest per capita use level (of 2002). At the recent rate of per (2013) capita consumption,  
471 ecological footprint is going to increase 22.93% in 2050. But it can be 27.8% decreased from  
472 recent level if the lowest per capita level (1965) can be attained. Likewise, at a recent rate of  
473 per capita consumption (2010), the material footprint is going to increase 25.79% in 2050.  
474 But it can be 6.49% decreased from recent level if the lowest per capita level (2000) can be  
475 attained in 2050. Probable consequences of biophysical resource consumptions accompanied  
476 with lowest and highest rate per capita consumption for India are shown in Fig. 3.

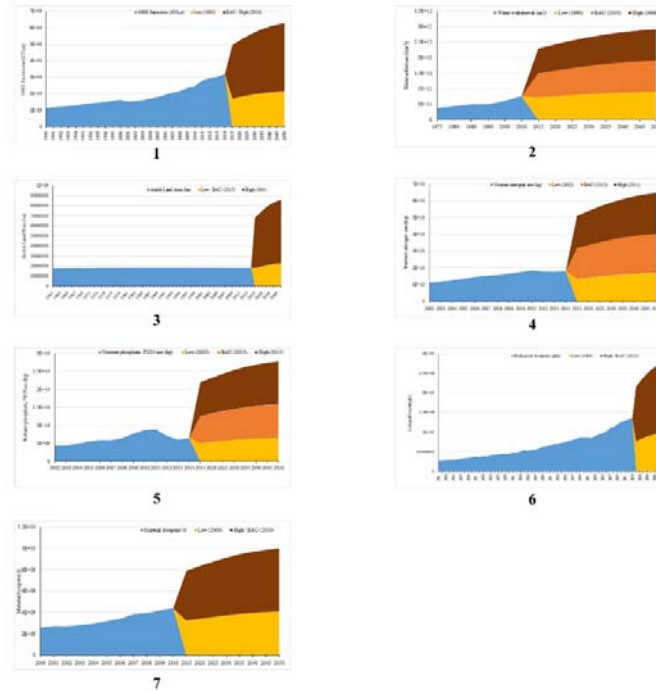

477

478 Fig. 3. Future scenario of biophysical indicators for India up to 2050.

479 Blue indicates changes in total values of consumption of biophysical indicators for India.

480 Brown indicates projected total values at the highest rate of per capita consumption; Orange

481 indicates projected total values at business-as-usual (BAU) rate of per capita consumption,

482 Yellow indicates projected total values at the lowest rate of per capita consumption.

#### 483 **Discussion:**

484 Though this field is nascent, there have been a lot of interdisciplinary studies related to either

485 only PB or SJS framework. Sayers and Trebeck (2015a) and Sayers (2015b) have applied DE

486 framework both for Welsh and UK. Chapron et al. (2017) have advised enforcing

487 environmental laws as tools to constraint human impacts on the environment through staying

488 under safe planetary boundaries. There have been a lot of debate surrounding a suitable

489 indicator for 'biosphere integrity' (Samper, 2009; Running, 2012; Mace et al., 2014;

490 Newbold et al., 2016), 'freshwater use' (Rockström and Karlberg, 2010; Bogardi et al., 2013;

491 Gerten et al., 2013; Heistermann, 2017) 'introduction of novel entities' (Sala and Goralczyk,

492 2013; Persson et al., 2013; Diamond et al., 2015; Villarrubia-Gómez et al., 2017)

493 accompanied by their respective safe boundaries. Some work has also been done on

494 connecting governance with the planetary boundary along with its policy implications

495 (Bierman, 2012, Galaz et al., 2012a, 2012b; Reischl, 2012). There has been a significant

496 amount of works on establishing and applying PB framework in regional scenario (Dearing et  
497 al., 2014; Häyhä et al., 2016; Cole et al., 2017; McLaughlin, 2018). Some important works  
498 also have been done to establish the connection of PB framework to the food system and  
499 nutrients (Kahiluoto et al., 2014, 2015; Campbell et al., 2017; Conijn et al., 2018). Nash et al.  
500 (2017) have prepared a framework to apply this PB framework in the marine context.  
501 Recently, there have been some criticisms too of this SJS framework (Montoya et al., 2018a,  
502 2018b).

503 Two previous studies have incorporated sustainability of India based on PB and SJS  
504 framework, Nykvist et al. (2013) and O'Neill et al (2018). Nykvist et al. (2013) have  
505 considered four planetary boundaries in their report, namely climate change ( $\text{tCO}_2$  per capita  
506  $\text{y}^{-1}$ ), nitrogen use ( $\text{kg N}$  per capita  $\text{y}^{-1}$ ), freshwater use ( $\text{m}^3$  per capita  $\text{y}^{-1}$ ) and land use (ha per  
507 capita). According to them, India did not cross per capita PB of climate change (for 2008,  
508 either in territorial or consumptive emission). Although, did not cross nitrogen flow PB  
509 (2005-2009 average), freshwater use PB (1996-2005) and land use PB (2005-2009). One  
510 problem in this study is that it did not include correlated social dimensions (i.e. DE  
511 framework or any other). O'Neill et al. (2018) used seven and eleven indicators for PB and  
512 DE analysis, respectively. According to them, India crossed only one boundary, climate  
513 change PB ( $\text{ton CO}_2$  per capita  $\text{y}^{-1}$ ) and not socially deprived in only one threshold,  
514 employment (% of the labour force employed).

515 The primary aim of this study was to evaluate the applicability of SJS framework at the  
516 national level in India. We have tried to maintain the original design and concept of the  
517 framework as much as possible while deriving results that are meaningful in the Indian  
518 national context.

519 If all Indians ought to lead a prosperous life within the safe limits of planetary boundaries,  
520 then resource utilization processes must be fundamentally restructured to enable basic needs  
521 at a lower level of resource consumption that does not significantly transgress planetary  
522 boundaries. Resource use could be reduced significantly in India with lowering per capita  
523 consumption while achieving a more equitable distribution of access to resources among all  
524 the people. To focus on sufficiency in biophysical resource consumption, recognizing the  
525 overconsumption is a key point which burdens Indian society with a mix of environmental  
526 and socioeconomic problems.

527 We have downscaled PB framework and applied SJS framework at a national scale, for India  
528 for the first time, creating an analysis for inclusive sustainable development for India. This  
529 work presents the present state and trajectory of a comprehensive yet manageable set of



530 indicators for environmental and social aspects. This work also highlights India's closeness to  
531 environmental boundaries and the nearness from the abolition of social deprivation as per UN  
532 SDG 2015 targets. Thus, it creates a preliminary monitoring and communication tool for the  
533 government to integrate environmental and social development issues. This study provides  
534 insight into the targets for the proposed global UN Sustainable Development Goals that are  
535 nationally relevant.

536 There are a few recommendations that we have come up during this work: (1) Sub-national  
537 level database should be established and carefully updated by the government that are  
538 publicly available. Because - globally defined boundaries can fall short for many SDG  
539 dimensions, where national resource availability limits and local thresholds are more suitable.  
540 (2) Data coverage period should be as long as possible along with monthly or at least daily  
541 data. Rather than a barrier, this should be utilized as a prospect for data-poor countries to  
542 begin a proficient targeted assemblage of comprehensive key data to address respective  
543 national to global challenges. (3) The multinational analysis should be done that can yield a  
544 comparative overview of national states. Also, each nation can understand which and where  
545 to focus to be able to meet UN SDG criteria. (4) Every indicator should be prepared in such a  
546 way that each can explore the national context and establish a connection with international  
547 academia. (5) It is necessary to use existing data for a nation (like – India) and refine this PB-  
548 SJS framework over time as more data are gathered until UN SDG criteria are accomplished.  
549 (6) Appropriate indicator to measure progress for the original Steffen's (2015) and Raworth's  
550 (2017) framework should be developed. (7) To tackle equity in resource consumption for rich  
551 and poor countries per capita boundaries should be integrated with steady-state economics  
552 (Daly, 1972, 2008; O'Neill, 2012, 2015; Kosoy et al., 2012; Steffen and Smith, 2013),  
553 customized for each of the nation's economy, to solve of differences in the degree of  
554 development and the right to develop. (8) To signify the study, multiple variables should be  
555 compared for a certain period of time for groups of countries, especially clustering them  
556 based on the general understanding of political economy and geography. (9) Further work is  
557 necessary for an approach to analyze policymaking and their implementation gaps of each  
558 nation for all of the indicators in the SJS framework. Problems might ascend when any PB is  
559 only incompletely addressed in a national policy objective. (10) The importance of  
560 considering local environmental problems and threats to local ecological resilience should be  
561 emphasized during use of this type of methodologies and results. Though SJS framework was  
562 developed to highlight and strengthen understanding and awareness about the planetary  
563 consequences of different environmental processes due to anthropogenic pressures, it is not

564 that only the planetary problems are significant. SJS framework is to be used as a  
565 complementary to the analysis of local and national socio-ecological problems, which need to  
566 be addressed in their own significance regardless of the apparent absence of obvious and  
567 readily understandable planetary implications. (11) The PB framework ('safe' part) should be  
568 analyzed and results with policy adaptations are to be strictly implemented mostly in  
569 developed countries where social development has already taken place through eradication of  
570 deprivation, whereas DE framework ('just' part) should be adopted in less developed  
571 countries where social development is apparently more important and need of the hour. (12)  
572 When comparing the sustainability performance of countries based on SJS framework,  
573 developed countries (like – USA, UK, Germany, France etc.) and countries with rapidly  
574 growing economies (like – India, China etc.) are to be specially emphasized. These countries  
575 have either higher total or per capita impacts on the environment globally, and hence of  
576 bigger responsibility. (13) We recommend that every nation (like – India) should act more  
577 proactively and adopt policies according to recommendations of international bodies, like -  
578 UN, UNFCC, UNDP, UNEP etc. if the country desires to reduce its sustainability deficit.  
579 (14) Boundaries for all the dimensions under the PB framework, especially applicable to a  
580 national scale, should be established. (15) SJS framework should be accompanied with  
581 systems dynamic analysis of the interrelationships between any of the biophysical social  
582 conditions. Till now, it only conveys a basis for judging the relative state of current  
583 biophysical viability and societal wellbeing on a global scale. (16) There are some  
584 dimensions of biophysical resource consumption related to PB framework that done have any  
585 unanimously selected representative indicators along with corresponding boundaries,  
586 specially customized to fit national or sub-national level analysis, such as – change in  
587 biosphere integrity, stratospheric ozone depletion, ocean acidification, atmospheric aerosol  
588 loading and the introduction of novel entities. It should be a priority. (17) It should be kept in  
589 mind that just identifying indicators for the PB framework and their monitoring is not  
590 enough. If proper checkpoints need to made for these and for policy implications, drivers for  
591 each PB dimension for every nation should be identified first. (18) How to plan a future for a  
592 nation under safe limits of PB and equitably provisioning social development should be the  
593 point of concern in forthcoming times.

594 There are a few novelties of this work: First, it offers a pictorial portrait of the  
595 dynamic state of a set of socio-ecological indicators related to national priorities and  
596 scenarios in India. Our trend graphs show progress or regress over time that assists decision-  
597 making, and the amalgamation of environmental and social dimensions, along with the

598 underlying role of economics, emphasize the triple bottle line feature of the sustainable  
599 development. Second, this work interconnects a multifaceted set of indicators in a relatively  
600 modest way, recognizes the gap in the underlying knowledge-base, and promotes new queries  
601 towards the elimination of social deprivation and achievement of environmental sustainability  
602 in India. Third, it provides India's proximity to its environmental boundaries and its adequate  
603 level of social well-being. Fourth, the SDGs are supposed to be "action-oriented, concise and  
604 easy to communicate, limited in number, aspirational, global in nature and universally  
605 applicable to all countries, while taking into account different national realities, capacities  
606 and levels of development and respecting national policies and priorities" (Rio+20 outcome  
607 document, 2012). Almost all of these criteria have been met in this framework. Fifth, this  
608 work maintains a balance between simple and concise yet comprehensive, so that progress in  
609 all the SDGs in India can be understood (at least through one indicator for each SDG). Sixth,  
610 this study conveys insights into the challenges and complexities to develop appropriate  
611 indicators and boundaries at a national scale in India and focuses on zones where further  
612 research is needed to improvise this framework.

613

#### 614 **Acknowledgement:**

615 We would like to thank Sk. Rohan Tanvir, The Institution of Engineers (India) for his  
616 assistance during the preparation of diagrams and Bishal Ghosh, Department of Economics,  
617 Presidency University for valuable suggestions.

618

619 **Funding:** This research did not receive any specific grant from funding agencies in the  
620 public, commercial, or not-for-profit sectors.

621

622

623

624

625

626

627

628

629

630

631

632

633

634 **References**

635 Biermann, F., 2012. Planetary boundaries and earth system governance: exploring the links.  
636 *Ecol. Econ.* 81, 4–9. doi: 10.1016/j.ecolecon.2012.02.016.

637

638 Bogardi, J. J., Fekete, B., M., Vorosmarty, C. J., 2013. Planetary boundaries revisited: a view  
639 through the 'water lens'. *Curr. Opin. Environ. Sustain.* 5 (6), 581–589. doi:  
640 10.1016/j.cosust.2013.10.006.

641

642 Borucke, M., Moore, D., Cranston, G., Gracey, K., Iha, K., Larson, J., Lazarus, E., Morales,  
643 J. C., Wackernagel, M., Galli, A., 2013. Accounting for demand and supply of the  
644 biosphere's regenerative capacity: The National Footprint Accounts' underlying methodology  
645 and framework. *Ecol. Indic.* 24, 518–533. doi: 10.1016/j.ecolind.2012.08.005.

646

647 Campbell, B. M., Beare, D. J., Bennett, E. M., Hall-Spencer, J. M., Ingram, J. S. I., Jaramillo,  
648 F., Ortiz, R., Ramankutty, N., Sayer, J. A., Shindell, D., 2017. Agriculture production as a  
649 major driver of the Earth system exceeding planetary boundaries. *Ecol. Soc.* 22 (4), 8. doi:  
650 10.5751/ES-09595-220408.

651

652 Carpenter, S.R., Bennett, E.M., 2011. Reconsideration of the planetary boundary for  
653 phosphorus. *Environ. Res. Lett.* 6, 014009, doi:10.1088/1748-9326/6/1/014009.

654

655 Chapron, G., Epstein, Y., Trouwborst, A., López-Bao, J. V., 2017. Bolster legal boundaries to  
656 stay within planetary boundaries. *Nat. Ecol. Evol.* 1, 0086. doi: 10.1038/s41559-017-0086.

657 Cole, M. J., Bailey, R. M., New, M. G., 2017. Spatial variability in sustainable development  
658 trajectories in South Africa: provincial level safe and just operating spaces. *Sust. Sci.* 12 (5),  
659 829-848. doi: 10.1007/s11625-016-0418-9.

660

661 Cole, M. J., Bailey, R. M., New, M. G., 2014. Tracking sustainable development with a  
662 national barometer for South Africa using a downscaled “safe and just space” framework.  
663 *Proc. Natl. Acad. Sci. USA* 111, E4399–E4408. doi: 10.1073/pnas.1400985111.

664

- 665 Conijn, J. G., Bindraban, P. S., Schröder, J. J., Jongschaap, R. E. E., 2018. Can our global  
666 food system meet food demand within planetary boundaries? *Agric. Ecosyst. Environ.* 251,  
667 244–256. doi: 10.1016/j.agee.2017.06.001.
- 668 Daly, H. E., 2008. A steady-state economy: Opinion piece for redefining prosperity. London:  
669 Sustainable Development Commission.  
670
- 671 Daly, H.E., 1977. Steady-state Economics; Science and Society. W. H. Freeman and Co, New  
672 York.  
673
- 674 Dao, H., Peduzzi, P., Chatenoux, B., Bono, A. D., Schwarzer, S., Friot, D., 2015.  
675 Environmental Limits and Swiss Footprints Based on Planetary Boundaries. (UNEP/GRID-  
676 Geneva and University of Geneva, Geneva).  
677
- 678 Dao, H., Peduzzi, P., Friot, D., 2018. National environmental limits and footprints based on  
679 the Planetary Boundaries framework: The case of Switzerland. *Glob. Environ. Chang.* 52, 49-  
680 57. doi: 10.1016/j.gloenvcha.2018.06.005.  
681
- 682 Dearing, J.A., Wang, R., Zhang, K., Dyke, J. G., Haberl, H., Hossain, S., Langdon, P. G.,  
683 Lenton, T. M., Raworth, K., Brown, S., Carstensen, J., Cole, M. J., Cornell, S. E., Dawson, T.  
684 P., Doncaster, C. P., Eigenbrod, F., Flo'rke, M., Jeffers, E., Mackay, A. W., Nykvist, B.,  
685 Poppy, G. M., 2014. Safe and just operating spaces for regional social-ecological system.  
686 *Glob. Environ. Chang.* 28:227–238. doi: 10.1016/j.gloenvcha.2014.06.012.  
687
- 688 Diamond, M. L., deWit, C. A., Molander, S., Scheringer, M., Backhaus, T., Lohmann, R.,  
689 Rickard Arvidsson, R., Bergman, Å, Hauschild, M., Holoubek, I., Persson, L., Suzuki, N.,  
690 Vighi, M., Zetzsch, C., 2015. Exploring the planetary boundary for chemical pollution.  
691 *Environ. Int.* 78, 8–15. doi: 10.1016/j.envint.2015.02.001.  
692
- 693 Dittrich, M., Giljum, S., Lutter, S., Polzin, C., 2012. Green Economies Around the World?  
694 Implications of Resource Use for Development and the Environment. (Sustainable Europe  
695 Research Institute, Vienna).  
696
- 697 Food and Agriculture Organization, 2018. FAO Statistical Database. (<http://faostat.fao.org/>)  
698 (accessed 17.04.2018).

699

700 Galaz, V., Biermann, F., Crona, B., Folke, C., et al., 2012a. ‘Planetary boundaries’—  
701 exploring the challenges for earth system governance. *Curr. Opin. Environ. Sustain.* 4, 80–  
702 87. doi: 10.1016/j.cosust.2012.01.006

703

704 Galaz, V., Crona, B., Österblom, H., Olsson, P., Folke, C., 2012b. Polycentric systems and  
705 interacting planetary boundaries — Emerging governance of climate change–ocean  
706 acidification– marine biodiversity. *Ecol. Econ.* 81, 21–32. doi:  
707 10.1016/j.ecolecon.2011.11.012.

708

709 Gerten, D., Hoff, H., Rockström, J., Jägermeyr, J., Kummu, M., Pastor, A.V., 2013. Towards  
710 a revised planetary boundary for consumptive freshwater use: role of environmental flow  
711 requirements. *Curr. Opin. Environ. Sustain.* 5, 551–558. doi: 10.1016/j.cosust.2013.11.001.

712

713 Global Footprint Network, 2018. National Footprint Accounts (GFN, Oakland, California).  
714 (accessed 17.04.2018).

715

716 Griggs, D., Stafford-Smith, M., Gaffney, O., Nature, J.R.-, 2013. Policy: Sustainable  
717 development goals for people and planet. *Nature*, 495, 305-307. doi: 10.1038/495305a.

718

719 Häyhä, T., Lucas, P. L., van Vuuren, D. P., Cornell, S. E., Hoff, H., 2016. From planetary  
720 boundaries to national fair shares of the global safe operating space— How can the scales be  
721 bridged? *Glob. Environ. Change* 40, 60–72. doi: 10.1016/j.gloenvcha.2016.06.008.

722

723 Heistermann, M., 2017. HESS Opinions: A planetary boundary on freshwater use is  
724 misleading. *Hydrol. Earth Syst. Sci.* 21, 3455–3461. doi:10.5194/hess-21-3455-2017.

725

726 Hoff, H., Nykvist, B., Carson, M., 2014. “Living well, within the limits of our planet”?  
727 Measuring Europe's growing external footprint. (Stockholm Environment Institute, Sweden)

728 Kahiluoto, H., Kuisma, M., Kuokkanen, A., Mikkilä, M., Linnanen, L. 2014. Taking  
729 planetary nutrient boundaries seriously: Can we feed the people? *Glob Food Sec.* 3, 16–21.  
730 doi: 10.1016/j.gfs.2013.11.002.

731

- 732 Kahiluoto, H., Kuisma, M., Kuokkanen, A., Mikkilä, M., Linnanen, L. 2015. Local and social  
733 facets of planetary boundaries: right to nutrients. *Environ. Res. Lett.* 10, 104013. doi:  
734 10.1088/1748-9326/10/10/104013.  
735
- 736 Kosoy, N., Brown, P. G., Bosselmann, K., Duraiappah, A., Mackey, B., Martinez-Alier, J.,  
737 Rogers, D., Thomson, R., 2012. Pillars for a flourishing Earth: planetary boundaries,  
738 economic growth delusion and green economy. *Curr. Opin. Environ. Sustain.* 4 (1), 74–79.  
739 doi: 10.1016/j.cosust.2012.02.002.  
740
- 741 Mace, G. M., Reyers, B., Alkemade, R., Oonsie, R., Stuart, F., Cornell, S. E., Diaz, S.,  
742 Jennings, S., Leadley, P., Mumby, P., Purvis, A., Scholes, R. J., Seddon, A. W. R., Solan, M.,  
743 Steffen, W., Woodward, G., 2014. Approaches to defining a planetary boundary for  
744 biodiversity. *Glob. Environ. Change* 28, 289–297. doi: 10.1016/j.gloenvcha.2014.07.009.  
745
- 746 McLaughlin, J. F., 2018. Safe operating space for humanity at a regional scale. *Ecol. Soc.*  
747 23(2), 43. doi: 10.5751/ES-10171-230243.  
748
- 749 Montoya, J. M., Donohue, I., Pimm, S. L., 2018a. Planetary Boundaries for Biodiversity:  
750 Implausible Science, Pernicious Policies. *Trends. Ecol. Evol.* 33 (2), 71-93. doi:  
751 10.1016/j.tree.2017.10.004.  
752
- 753 Montoya, J. M., Donohue, I., Pimm, S. L., 2018b. Why a Planetary Boundary, If It Is Not  
754 Planetary, and the Boundary Is Undefined? A Reply to Rockström et al. *Trends. Ecol. Evol.*  
755 33 (4), 234. doi: 10.1016/j.tree.2018.01.008.  
756
- 757 Nash, K. L., Cvitanovic, C., Fulton, E. A., Halpern, B. S., Milner-Gulland, E. J., Watson, R.  
758 A., Blanchard, J. L., 2017. Planetary boundaries for a blue planet. *Nat. Ecol. Evol.* 1(11),  
759 1625-1634. doi: 10.1038/s41559-017-0319-z.  
760
- 761 Newbold, T., Hudson, L. N., Arnell, A. P., Contu, S., Palma, A. D., Ferrier, S., Hill, S. L. L.,  
762 Hoskins, A. J., Lysenko, I., Phillips, H. R. P., Burton, V. J., Chng, C. W. T., Emerson, S.,  
763 Gao, D., Pask-Hale, G., Hutton, J., Jung, M., Sanchez-Ortiz, K., Simmons, B. I., Whitmee, S.,  
764 Zhang, H., Scharlemann, J. P. W., Purvis, A., 2016. Has land use pushed terrestrial

- 765 biodiversity beyond the planetary boundary? A global assessment. *Science* 353 (6296), 288-  
766 291. doi: 10.1126/science.aaf2201.
- 767
- 768 Nilsson, M., Griggs, D., Visbeck, M., 2016. Policy: Map the interactions between Sustainable  
769 Development Goals. *Nature*, 534, 320-322. doi: 10.1038/534320a.
- 770
- 771 Nykvist, B., Persson, A., Moberg, F., Persson, L., Cornell, S., Rockström, J., 2013. National  
772 Environmental Performance on Planetary Boundaries. (Swedish Environmental Protection  
773 Agency Report 6576, Stockholm).
- 774
- 775 O'Neill, D. W., 2012. Measuring progress in the degrowth transition to a steady state  
776 economy. *Ecol Econ.* 84: 221–231. doi:10.1016/j.ecolecon.2011.05.020.
- 777
- 778 O'Neill, D. W., 2015. What Should Be Held Steady in a Steady-State Economy? Interpreting  
779 Daly's Definition at the National Level. *J Ind Ecol.* 19 (4), 552-563. doi: 10.1111/jiec.12224.
- 780 O'Neill, D. W., Fanning, A. L., Lamb, W. F., Steinberger, J. K., 2018. A good life for all  
781 within planetary boundaries. *Nat. Sust.* 1, 88–95. doi: 10.1038/s41893-018-0021-4.
- 782
- 783 Persson, L. M., Breitholtz, M., Cousins, I. T., de Wit, C. A., MacLeod, M., McLachlan, M.S.,  
784 2013. Confronting unknown planetary boundary threats from chemical pollution. *Environ.*  
785 *Sci. Technol.* 47, 12619–12622. doi: 10.1021/es402501c.
- 786
- 787 Raworth, K., 2012. A Safe and Just Space for Humanity: Can We Live Within the Doughnut?  
788 Oxfam Discussion Paper. Oxfam, Oxford, UK.
- 789
- 790 Raworth, K., 2017a. A Doughnut for the Anthropocene: humanity's compass in the 21st  
791 century. *Lancet Planet. Health.* 1 (2), e48–e49. doi: 10.1016/S2542-5196(17)30028-1.
- 792 Raworth, K., 2017b. Doughnut Economics: Seven Ways to Think Like a 21st-Century  
793 Economist (Random House, London).
- 794
- 795 Reischl, G., 2012. Designing institutions for governing planetary boundaries—lessons from  
796 global forest governance. *Ecol Econ.* 81, 33–40.



- 797 Rockström, J., Karlberg, L., 2010. The quadruple squeeze: defining the safe operating space  
798 for freshwater use to achieve a triply green revolution in the Anthropocene. *AMBIO A J.*  
799 *Hum. Environ.* 39, 257–265. doi: 10.1007/s13280-010-0033-4.  
800
- 801 Rockström, J., Karlberg, L., 2010. The Quadruple Squeeze: Defining the safe operating space  
802 for freshwater use to achieve a triply green revolution in the Anthropocene. *AMBIO A J.*  
803 *Hum. Environ.* 39 (3), 257-265. doi: 10.1007/s13280-010-0033-4.  
804
- 805 Rockström, J., Steffen, W., Noone, K., Persson, A., Chapin, F.S., Lambin, E., Lenton, T.M.,  
806 Scheffer, M., Folke, C., Schellnhuber, H.J., Nykvist, B., de Wit, C.A., Hughes, T., van der  
807 Leeuw, S., Rodhe, H., Sorlin, S., Snyder, P.K., Costanza, R., Svedin, U., Falkenmark, M.,  
808 Karlberg, L., Corell, R.W., Fabry, V.J., Hansen, J., Walker, B., Liverman, D., Richardson, K.,  
809 Crutzen, P., Foley, J., 2009a. A safe operating space for humanity. *Nature*, 461, 472-475. doi:  
810 10.1038/461472a.  
811
- 812 Rockström, J., Steffen, W., Noone, K., Persson, Å., Chapin, F.S., Lambin, E., Lenton, T.M.,  
813 Scheffer, M., Folke, C., Schellnhuber, H.J., Nykvist, B., de Wit, C.A., Hughes, T., van der  
814 Leeuw, S., Rodhe, H., Sörlin, S., Snyder, P.K., Costanza, R., Svedin, U., Falkenmark, M.,  
815 Karlberg, L., Corell, R.W., Fabry, V.J., Hansen, J., Walker, B., Liverman, D., Richardson, K.,  
816 Crutzen, P., Foley, J., 2009b. Planetary boundaries: Exploring the safe operating space for  
817 humanity. *Ecol. Soc.* 14 (2), 32. doi: 10.5751/ES-03180-140232.  
818
- 819 Running, S. W., 2012. A Measurable Planetary Boundary for the Biosphere. *Science* 337  
820 (6101), 1458-1459. doi: 10.1126/science.1227620.  
821
- 822 Sachs, D. J., 2012. From millennium development goals to sustainable development goals.  
823 *Lancet*, 379, 2206-2211. doi: 10.1016/S0140-6736(12)60685-0.  
824
- 825 Sala, S., Goralczyk, M., 2013. Chemical footprint: a methodological framework for bridging  
826 life cycle assessment and planetary boundaries for chemical pollution. *Integr. Environ.*  
827 *Assess. Manag.* 9, 623–632. doi: 10.1002/ieam.1471.  
828
- 829 Samper, C., 2009. Planetary boundaries: rethinking biodiversity. *Nat. Rep. Clim. Change*,  
830 3,118–119. doi:10.1038/climate.2009.99.

- 831 Sayers, M., 2015b. The Welsh Doughnut: A framework for environmental sustainability and  
832 social justice. Oxfam, Oxford, UK.  
833
- 834 Sayers, M., Trebeck, K., 2015a. The UK Doughnut: A framework for environmental  
835 sustainability and social justice. Oxfam, Oxford, UK.  
836
- 837 Smil, V., 2000. *Energies: An Illustrated Guide to the Biosphere and Civilization* (MIT Press).
- 838 Steffen, W., Crutzen, P.J., McNeill, J.R., 2007. The Anthropocene: Are Humans Now  
839 Overwhelming the Great Forces of Nature. *AMBIO A J. Hum. Environ.* 36 (8), 614-621. doi:  
840 10.1579/0044-7447(2007)36[614:TAAHNO]2.0.CO;2.  
841
- 842 Steffen, W., Persson, Å., Deutsch, L., Zalasiewicz, J., Williams, M., Richardson, K.,  
843 Crumley, C., Crutzen, P., Folke, C., Gordon, L., Molina, M., Ramanathan, V., Rockström, J.,  
844 Scheffer, M., Schellnhuber, H.J., Svedin, U., 2011. The anthropocene: From global change to  
845 planetary stewardship, *AMBIO A J. Hum. Environ.* 40 (7), 739-761. doi: 10.1007/s13280-  
846 011-0185-x.
- 847 Steffen, W., Richardson, K., Rockström, J., Cornell, S.E., Fetzer, I., Bennett, E.M., Biggs, R.,  
848 Carpenter, S.R., de Vries, W., de Wit, C.A., Folke, C., Gerten, D., Heinke, J., Mace, G.M.,  
849 Persson, L.M., Ramanathan, V., Reyers, B., Sörlin, S., 2015. Planetary boundaries: guiding  
850 human development on a changing planet. *Science* 80:347. doi:10.1126/science.1259855  
851 1259855.  
852
- 853 Steffen, W., Smith, M.S., 2013. Planetary boundaries, equity and global sustainability: why  
854 wealthy countries could benefit from more equity, *Curr. Opin. Environ. Sustain.* 5 (3-4),  
855 403-408. doi: 10.1016/j.cosust.2013.04.007.  
856
- 857 Transparency International, 2018. Corruption perceptions index 2017  
858 (<https://www.transparency.org/>). (accessed 17.04.2018).  
859
- 860 United Nations Development Programme, 2015. Human Development Report 2015, New  
861 York.  
862
- 863 United Nations Environment Programme, 2017. The Emissions Gap Report. (UNEP, Nairobi)  
864

865 United Nations World Population Prospects: The 2017 Revision, (Population Division,  
866 Department of Economic and Social Affairs, United Nations, 2017).

867

868 United Nations, 2012. The future we want – outcome document (A/RES/66/288).

869

870 United Nations, 2015. Transforming Our World: The 2030 Agenda for Sustainable  
871 Development (United Nations, 2015).

872

873 UNU-WIDER, ‘World Income Inequality Database (WIID3.4) (accessed 17.04.2018).

874

875 Villarrubia-Gómez, P., Cornell, S. E., Fabres, J., 2017. Marine plastic pollution as a planetary  
876 boundary threat – The drifting piece in the sustainability puzzle. *Mar. Policy* doi:  
877 10.1016/j.marpol.2017.11.035.

878

879 Waters, C. N., Zalasiewicz, J., Summerhayes, C., Barnosky, A. D., Poirier, C., Gałuszka, A.,  
880 Cearreta, A., Edgeworth, M., Ellis, E. C., Ellis, M., Jeandel, C., Leinfelder, R., McNeill, J. R.,  
881 Richter, D., Steffen, W., Syvitski, J., Vidas, D., Wagleich, M., Williams, M., Zhisheng, A.,  
882 Grinevald, J., Odada, E., Oreskes, N., Wolfe, A. P., 2016. The Anthropocene is functionally  
883 and stratigraphically distinct from the Holocene. *Science* 351 (6269), 138-148. doi:  
884 10.1126/science.aad2622.

885

886 Wiedmann, T. O., Schandl, H., Lenzen, M., Moran, D., Suh, S., West, J., Kanemoto, K.,  
887 2015. The material footprint of nations. *Proc Natl Acad Sci USA* 112, 6271-6276,  
888 doi:10.1073/pnas.1220362110.

889

890 World Bank *World Development Indicators* (World Bank, 2018); <http://data.worldbank.org/>  
891 (accessed 17.04.2018).

892

893 World Bank, 2018. Tracking SDG 7: The Energy Progress Report 2018 (World Bank,  
894 Washington DC).

895

896 World Commission on Environment and Development, 1987. Our Common Future. Oxford  
897 University Press, New York.

898

899 World Health Organization, 2015. World Health Statistics. (WHO, Geneva)

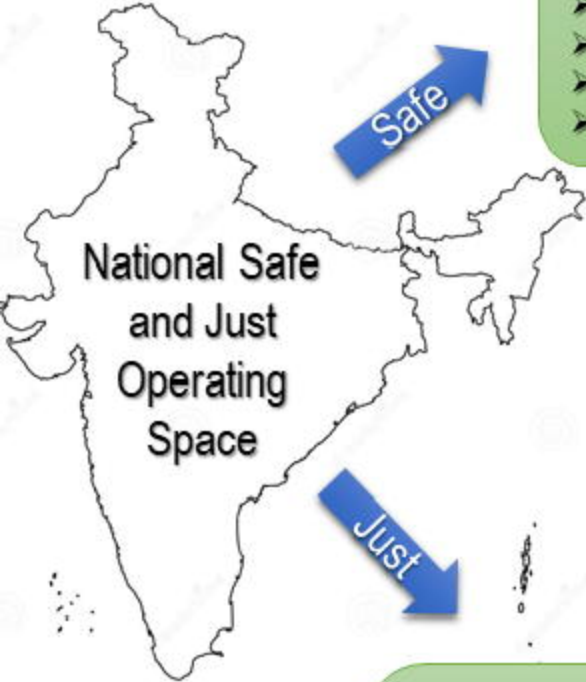

- Climate change (SDG 13)
- Freshwater use (SDG 6)
- Nitrogen use (SDG 14)
- Phosphorus use (SDG 14)
- Ecological footprint (SDG 14, 15)
- Material footprint (SDG 12)

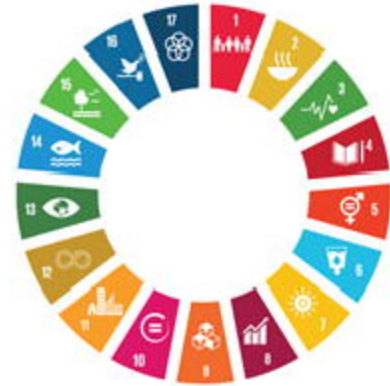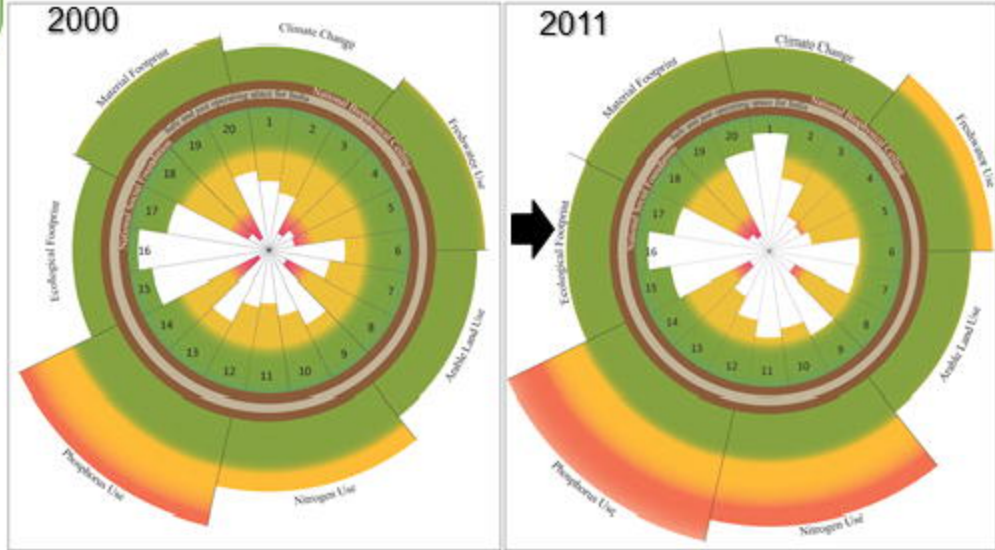

- Education (SDG 4)
- Energy (SDG 7)
- Food (SDG 2)
- Gender equality (SDG 5)
- Health (SDG 3)
- Housing (SDG 11)
- Income (SDG 1) & Work (SDG 8)
- Networks (SDG 9)
- Peace & Justice (SDG 16)
- Political voice (SDG 16)
- Social equity (SDG 10)
- Water & Sanitation (SDG 6)

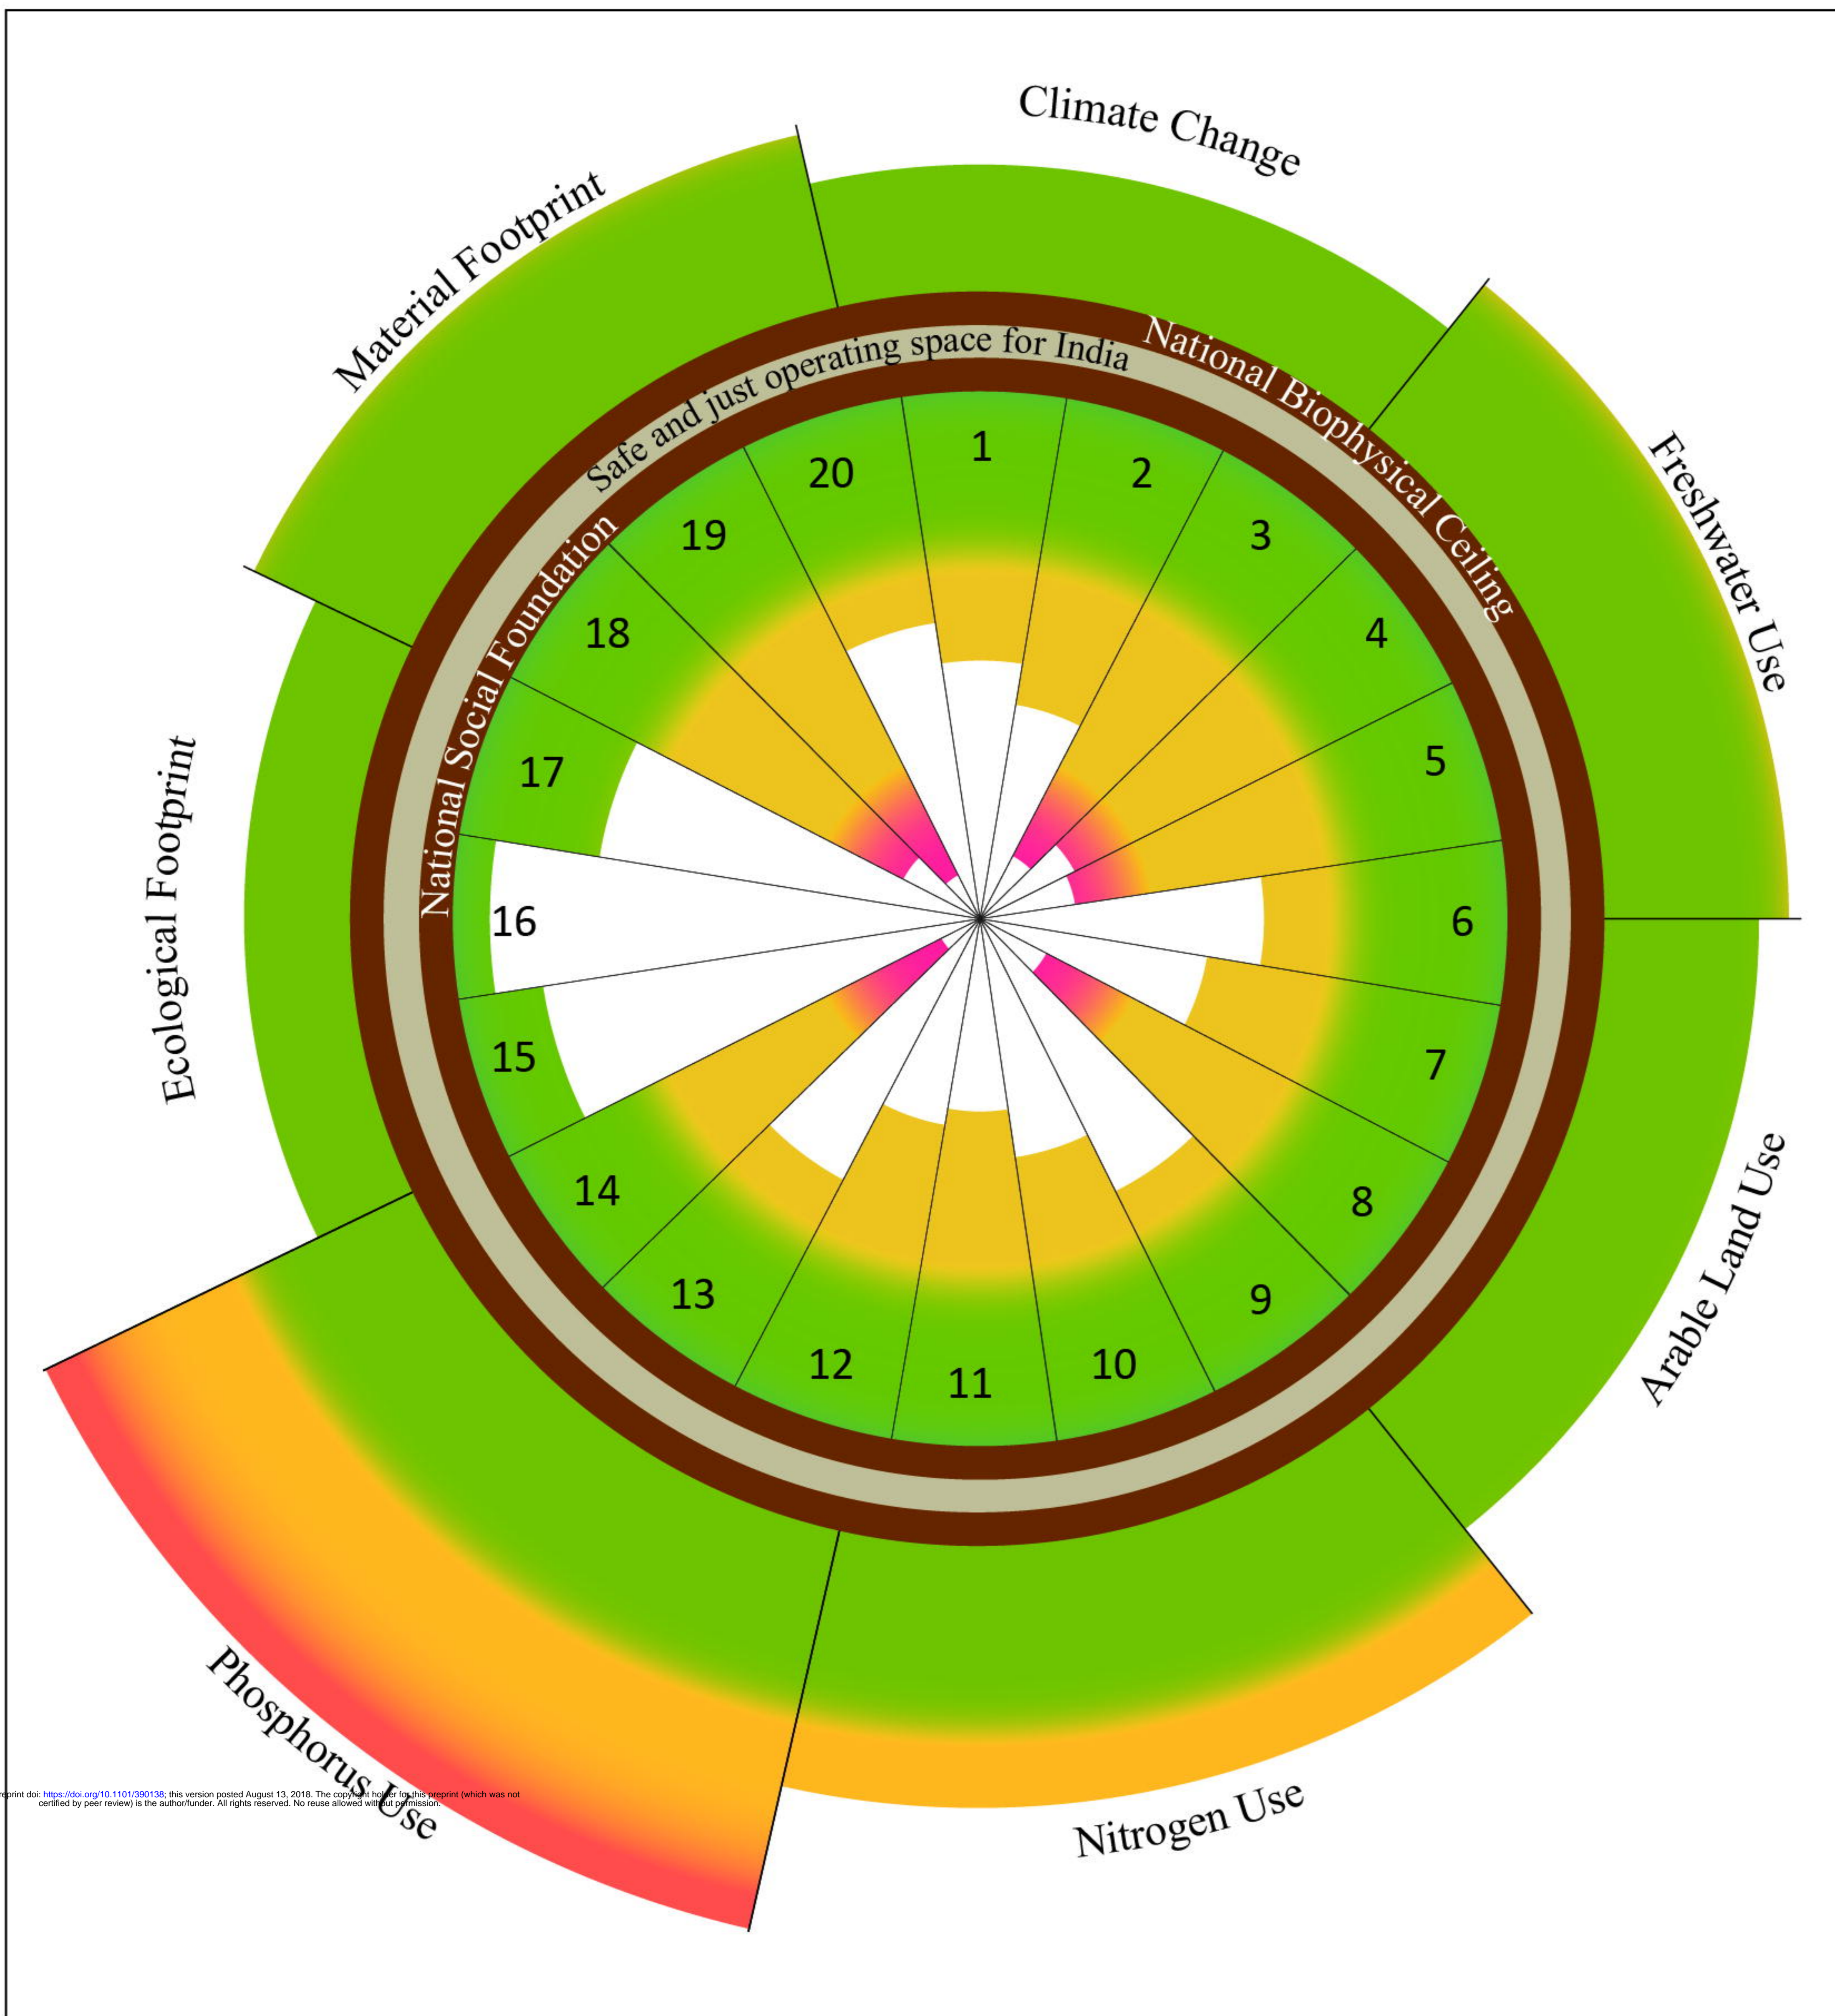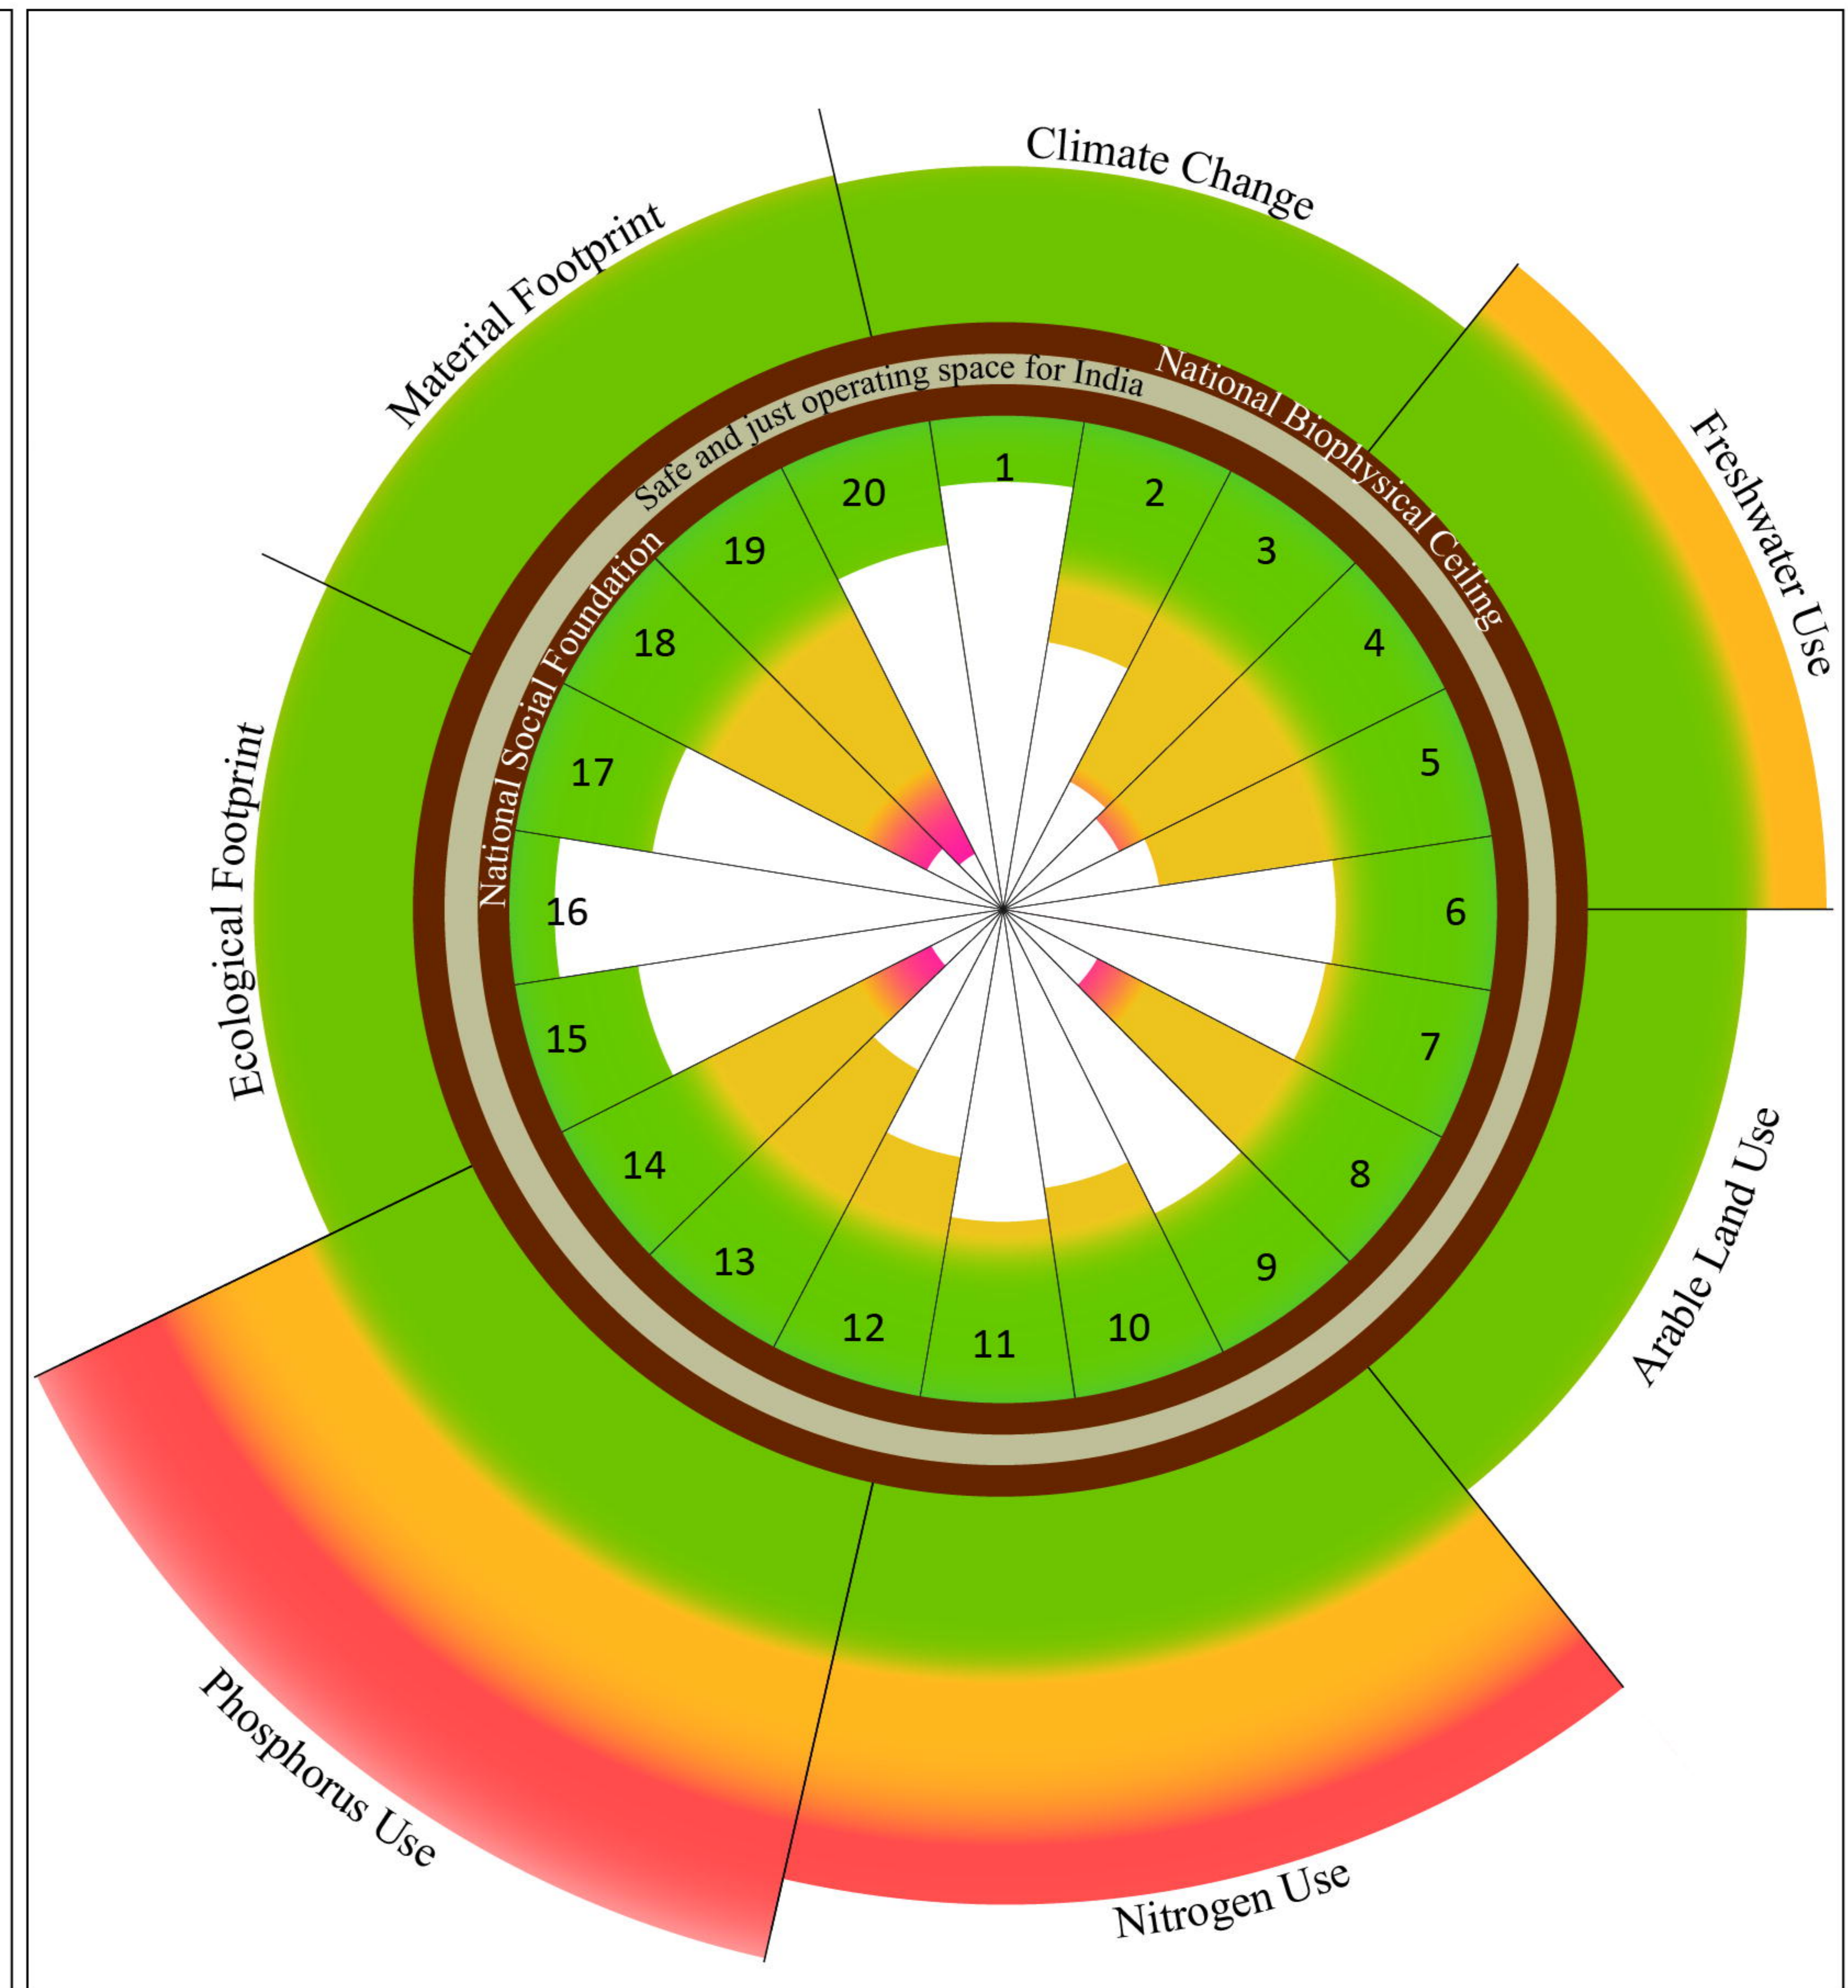

bioRxiv preprint doi: <https://doi.org/10.1101/200130>; this version posted August 13, 2018. The copyright holder for this preprint (which was not certified by peer review) is the author/funder. All rights reserved. No reuse allowed without permission.

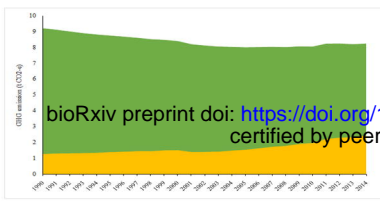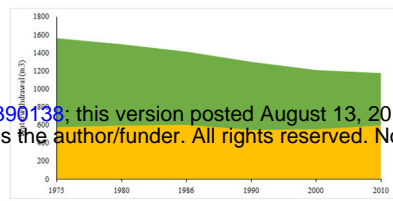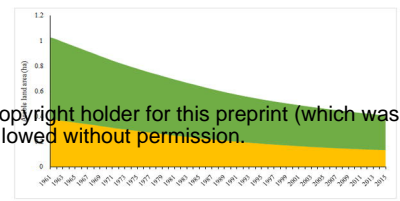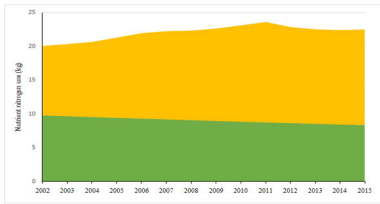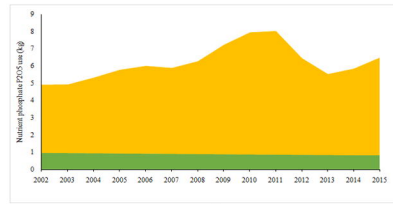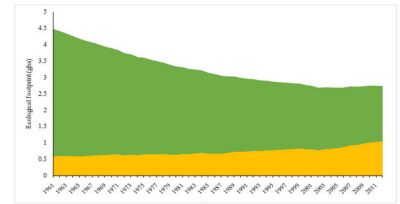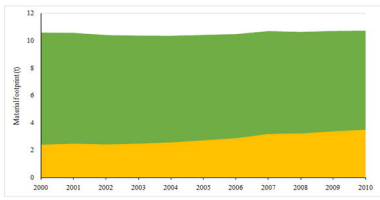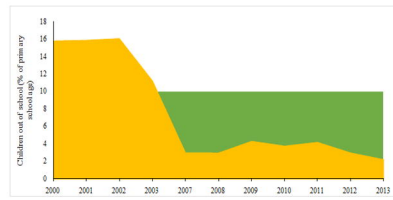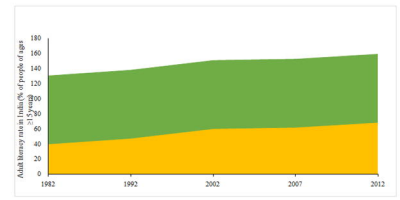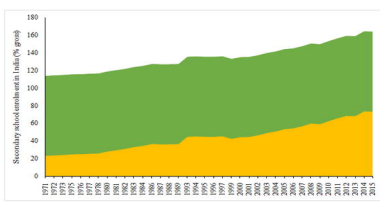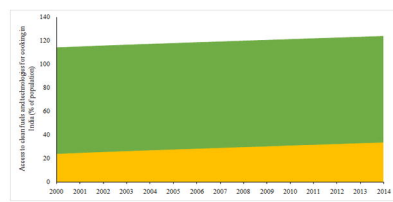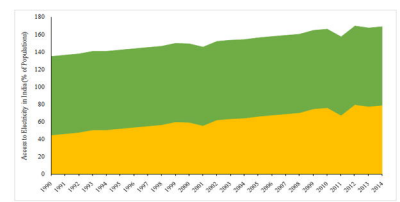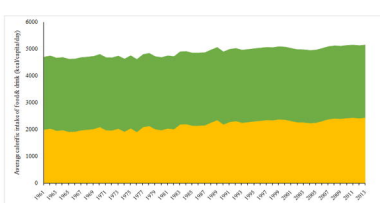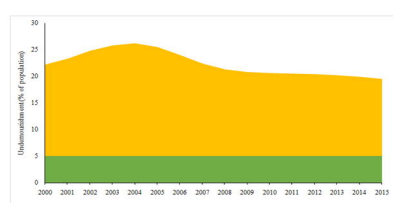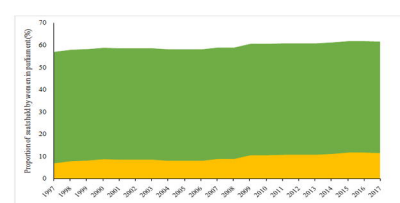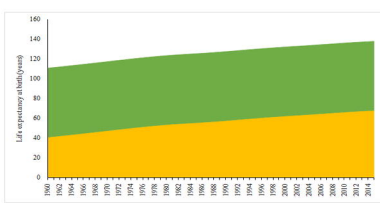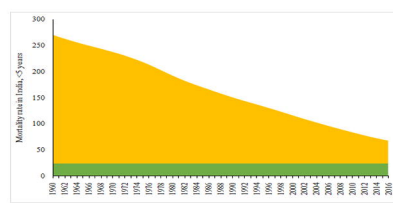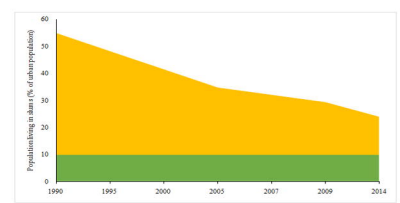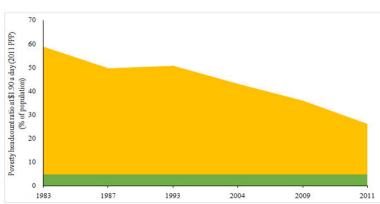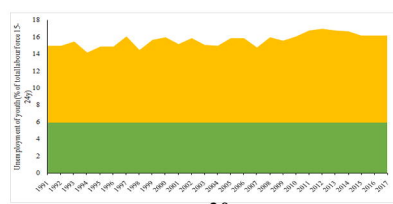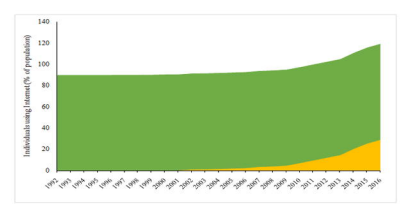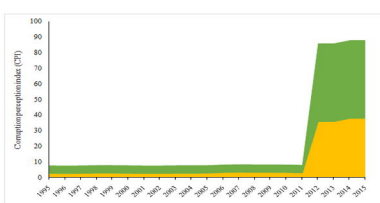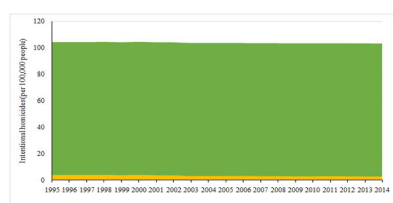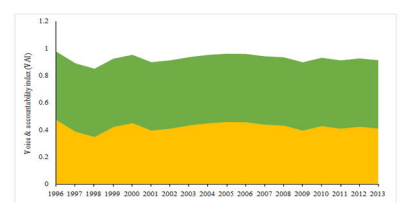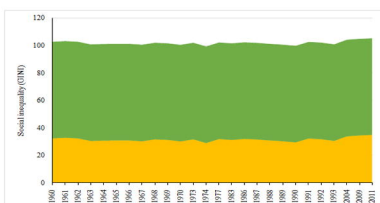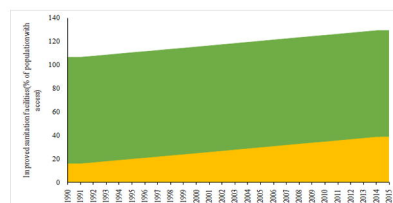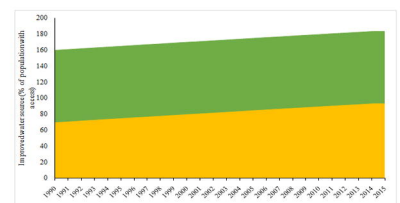

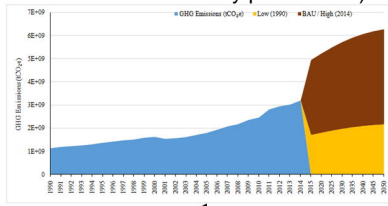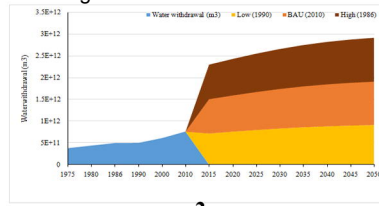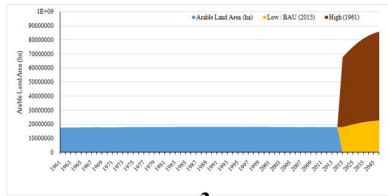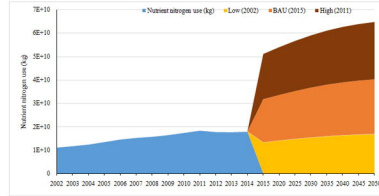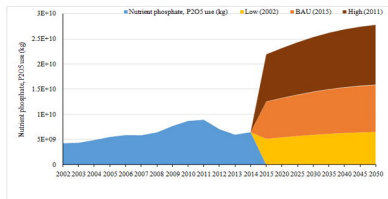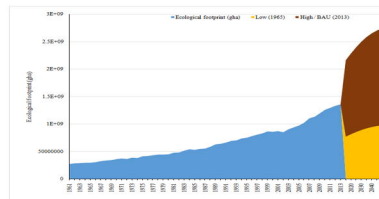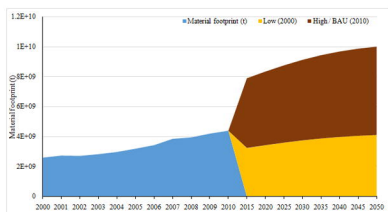

Source: http://biorxiv.org/content/10.1101/390138v1.full.pdf
